# Supplementary material
Source: Copernicus journal article supplement (doi:10.5194/egusphere-2026-1517)
Supplement: Supplementary file [file egusphere-2026-1517-AC3-supplement.pdf]

# Scatter plot of superficial velocity ( $V_{2SC}$ ) vs shock angle ( $\theta$ )

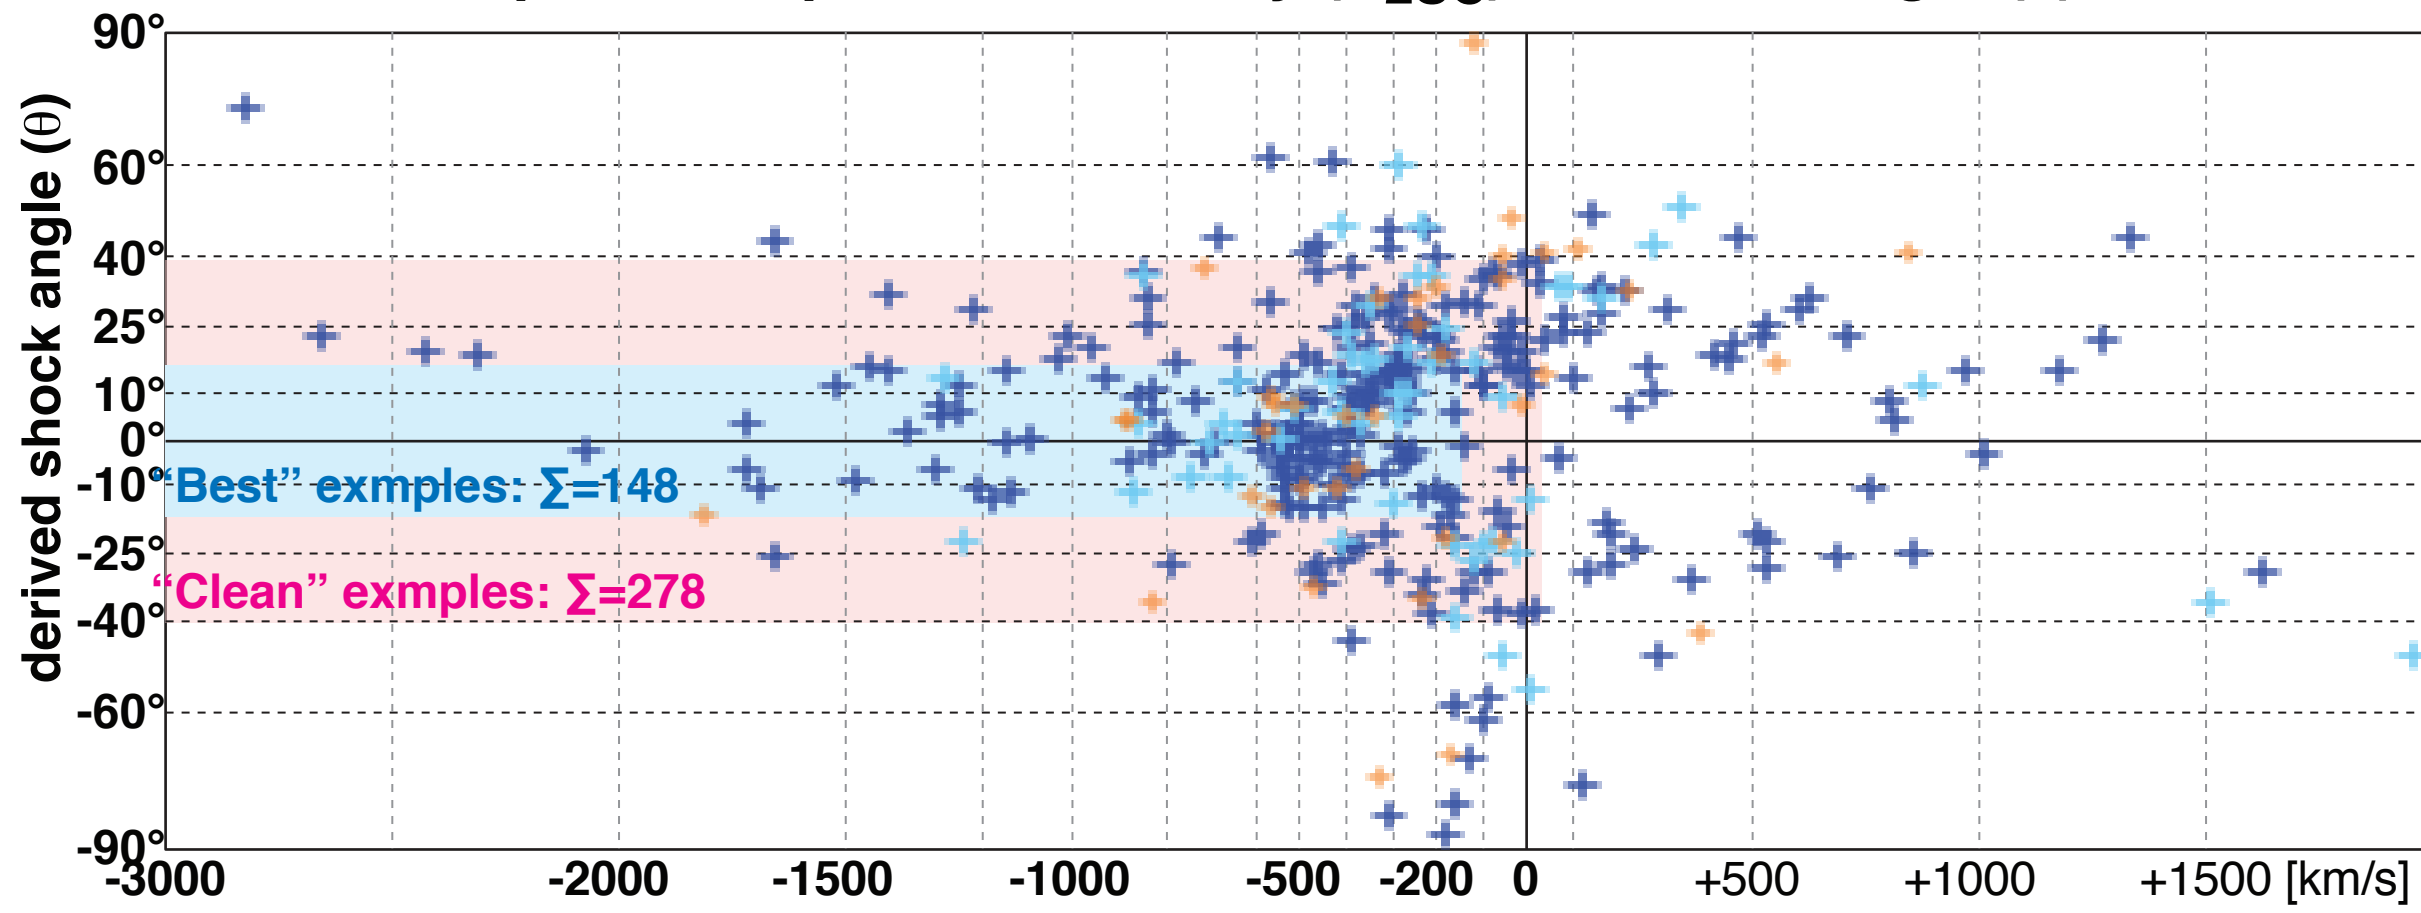

+ clear SC (by both methods)    + clear SC (by only SYM-H)    + weak SC

## SOHO results for "Best" shocks (148 samples)

(a) Difference in travel time (SOHO)

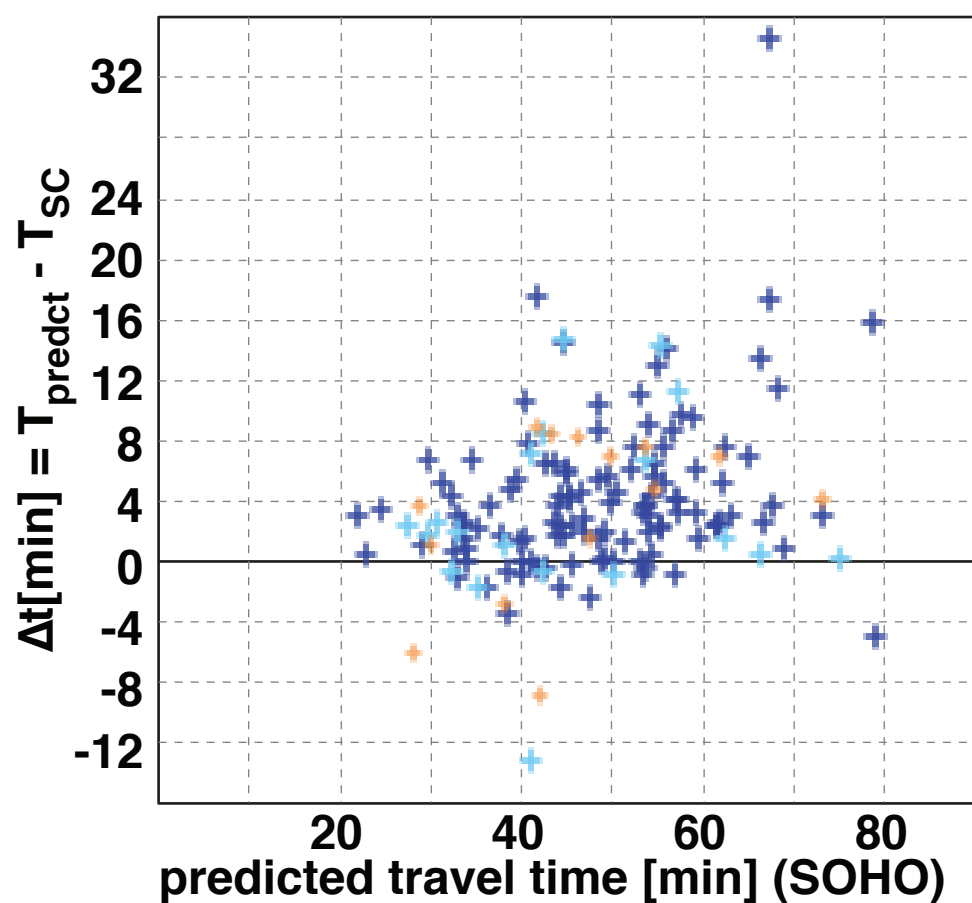

(b)  $V_{SW}$  vs  $V_{\text{timing}}$  (=  $\text{dist}/t_{sc-soho}$ )

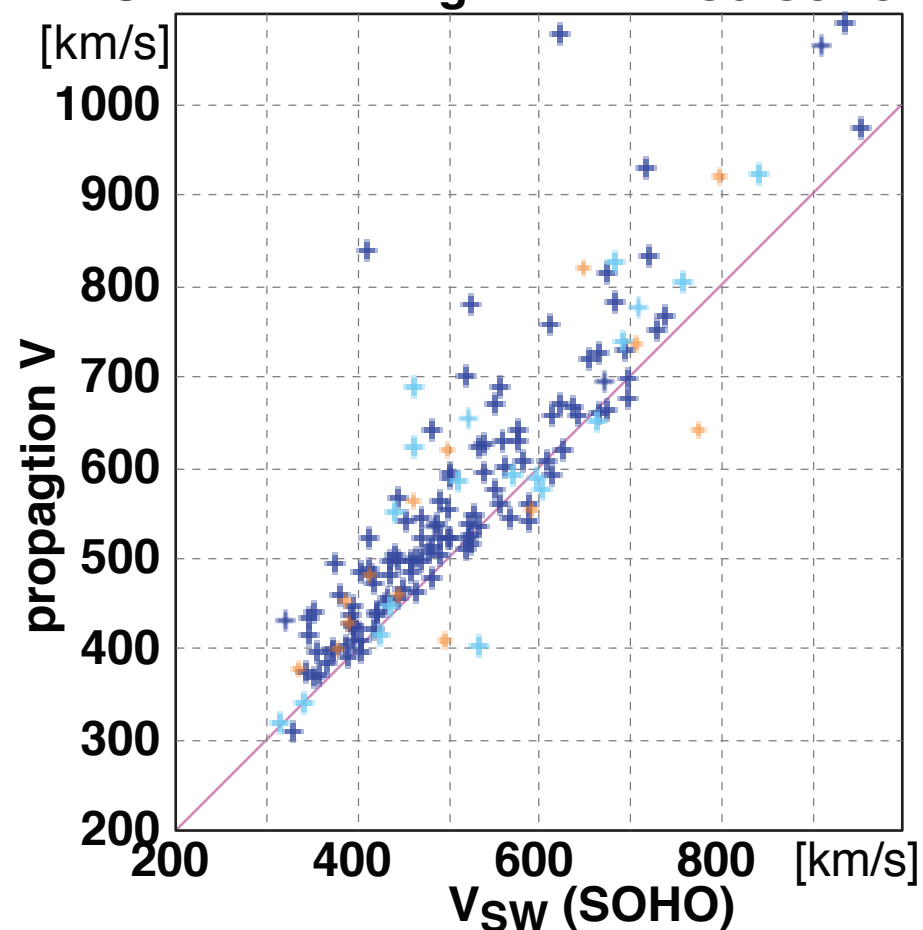

(c)  $V_{SW}$  vs ratio of  $V_{\text{timing}}/V_{SW}$

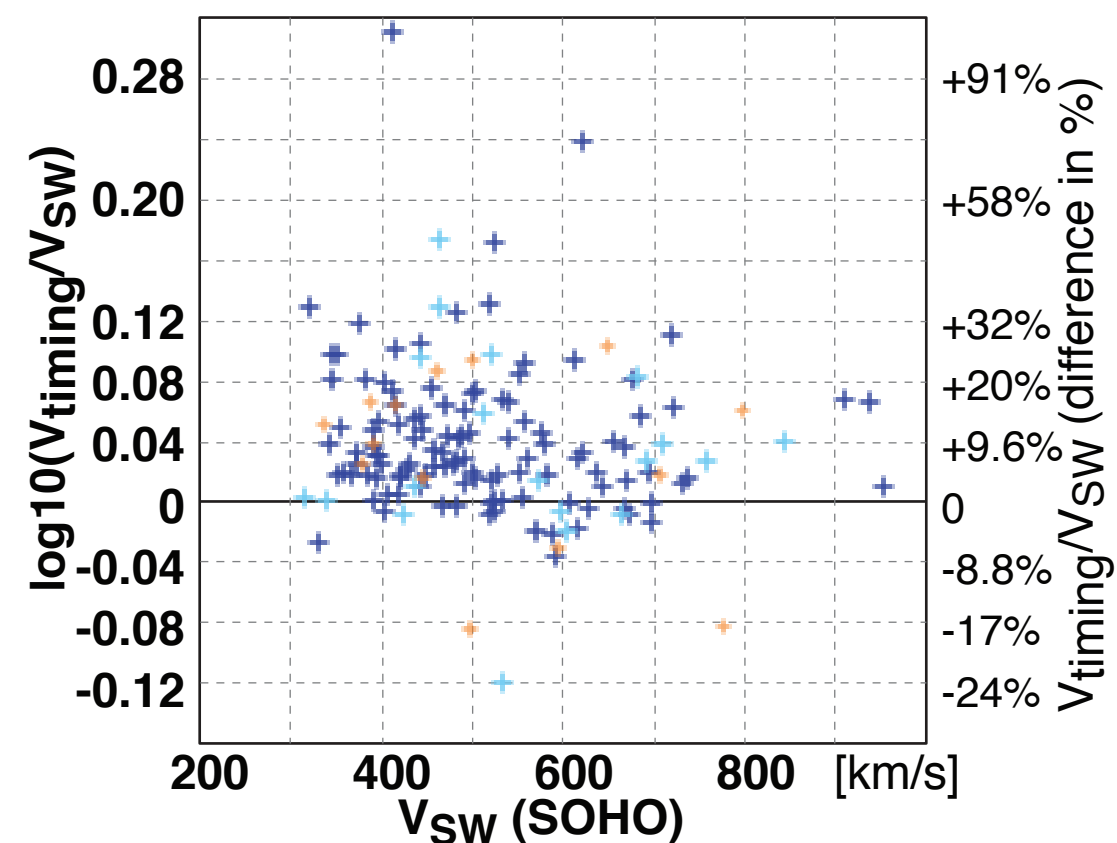

+ clear SC (both methods)    + clear SC (only SYM-H)    + weak SC
