# Supplementary material
Source: Copernicus journal article supplement (doi:10.5194/egusphere-2026-1517)
Supplement: Supplementary file [file egusphere-2026-1517-RC1-supplement.pdf]

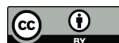

# Propagation of interplanetary (IP) shocks near the Earth

Masatoshi Yamauchi<sup>1,\*</sup>, Yoshihiro Yokoyama<sup>2,\*</sup>, Tsubasa Kotani<sup>3</sup>, and Jürgen Matzka<sup>4</sup>

<sup>1</sup>Swedish Institute of Space Physics, Kiruna, Sweden

<sup>2</sup>UiT, Arctic University of Norway, Tromsø, Norway

<sup>3</sup>Data Analysis Center for Geomagnetism and Space Magnetism, Graduate School of Science, Kyoto University, Kyoto, Japan

<sup>4</sup>GFZ Helmholtz Centre for Geosciences, Potsdam, Germany

\*This author contributed equally to this work.

**Correspondence:** M.Yamauchi (M.Yamauchi@irf.se)

**Abstract.** The solar wind monitor at the Sun-Earth L1 point has been used to estimate the arrival time of interplanetary (IP) shocks associated with coronal mass ejections (CMEs) and co-rotating interaction regions (CIRs). In standard estimates, including NASA/OMNI database, the radial propagation speed of the IP shock is assumed to be the same as the measured solar wind (proton) speed, although these speeds are known to be different in both the shock theory and CME observations. To  
5 diagnose the actual error in the arrival time of the IP shocks, we statistically compared the radial propagation speed of the IP shock with the measured solar wind speed at L1. The propagation speed is obtained from the time-of-propagation between the IP shock passage at the L1 monitoring spacecraft (SOHO and ACE) and at the Earth, the latter of which is represented by the geomagnetic sudden commencement (SC). In statistics, we limited to the IP shocks with a clear geomagnetic SC signature and with velocity profiles consistent between SOHO and ACE. During 1998-2022, 375 IP shocks satisfied such conditions. For the  
10 solar wind speed, the highest value during 15 min after the IP shock passage observed by the L1 monitoring spacecraft was used. We found the following tendencies. (1) As expected, actual arrival time of the IP shock to the Earth (represented by the geomagnetic SC) is often quite different from the predicted arrival time using the L1 velocity measurement. (2) For a majority of the cases, the geomagnetic SC is observed 0 – 10 min earlier than the predicted IP arrival time. (3) The speed difference is distributed asymmetrically toward faster propagation, with peak of the distribution about +10%.

## 15 1 Introduction

In solar-terrestrial physics including the relevant magnetospheric physics and space weather predictions, upstream monitoring of the solar wind parameters such as the velocity, density, and the interplanetary magnetic field (IMF) is essential. The upstream measurements of these values have been continuously made at the Sun-Earth Lagrange L1 region for nearly three decades by  
20 **SOHO and ACE spacecraft** (recently joined by DSCOVR spacecraft). With solar wind velocity and distance between these spacecraft and the Earth, one can roughly estimate the arrival time of the coronal mass ejection (CME) and other large changes in these parameters, such as interplanetary (IP) shocks and large IMF changes.

In these estimates of the arrival time, the Earthward propagation speed of the CME and other IP shocks along the Geocentric Solar Ecliptic (GSE) coordinate  $-X_{GSE}$  direction is normally assumed to be the same as the solar wind speed (anti-sunward

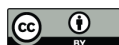

proton speed) measured at L1 (King and Papitashvili, 2026). However, the propagation speed of the IP shocks is known to be  
25 different from the solar wind speed in both the shock theory and CME observations.

In 1D shock models, the conservation of the mass flux across the shock in the shock-rest frame (Rankine-Hugoniot relation)  
requires that the higher-density side (solar wind after the IP shock passage) should have lower relative velocity to the shock. In  
the compressional (forward) shock, this condition can be achieved only if the shock speed is higher than the solar wind speed  
(see illustration in Appendix A for this textbook type relation). Theoretically, the shock propagation speed should be able to be  
30 derived from the measured changes in velocity and density. However, the observation of density, particularly its large increase,  
is often erroneous right after the IP shocks, causing such a calculated result unreliable. This is one of the reasons why the solar  
wind speed is used for predicting the arrival time of the IP shocks at the Earth. Furthermore, the actual IP shocks are not as  
ideal as simple models, and using density information might be misleading (an example is shown later).

For observation near the Sun, the CME front identified by SOHO LASCO imager sometimes propagates at velocity >1000  
35 km/s, being much faster than the solar wind velocity measured at L1 (e.g., Manoharan et al., 2001; Yashiro et al., 2004;  
Tokumaru et al., 2006; Gonzalez-Esparza and Aguilar-Rodriguez, 2009). Although the CME propagation is decelerated while  
the solar wind is accelerated with distance from the Sun, the IP shocks propagate faster than the solar wind even near the Earth.

The time difference also comes from the different reasons. If the IP shock front surface ("phase plane") is oblique like the  
sector boundary along the Parker's spiral, we expect both earlier or delayed arrival of the IP shock to the Earth compared to the  
40 predicted arrival time using L1 monitor value, because the location of the monitor spacecraft (SOHO, ACE, and DSCOVR) is  
offset from the Sun-Earth line (Richardson and Paularena, 1998; Collier et al., 1998). This "oblique" effect can be significant  
because the GSE  $Y$ - $Z$  location of the L1 monitor is normally at a large distance ( $\sim 10^{5-6}$  km) away from the Sun-Earth line in  
the huge L1 region. Fortunately, both SOHO and ACE take nearly the symmetric orbit with respect to the Sun-Earth line (i.e.,  
in the GSE  $Y$ - $Z$  direction). Therefore, the statistical average of the actual arrival time is expected to converge to the expected  
45 arrival time, unlike the time difference coming from the difference in speeds.

Another possibility is when the IP shock propagates "obliquely" in the GSE  $Y$ - $Z$  direction, like the flank side of CMEs or  
when a fast stream approaches the equatorial region from north or south. In such cases, the  $X_{GSE}$  component of the shock  
front's phase velocity will be quite different from the solar wind velocity. Fortunately, we again expect both earlier or delayed  
arrival of the IP shock to the Earth compared to the prediction using the solar wind speed values, and the same argument of the  
50 symmetry above applies to the statistic.

Since the arrival time of the IP shocks to the Earth is one of the essential information in understanding the solar wind-  
magnetosphere interaction including the space weather prediction, it is quite important to examine the degree of difference  
between the radial propagation speed of IP shock (including CME) and the speed of the solar wind near the Earth. This type  
of difference has been reported for the transit time of the IMF changes (e.g., Collier et al., 1998; Milan et al., 2022), but less  
55 well studied for the IP shocks (e.g., Paularena et al., 1998, 1999) without statistical studies near the Earth. The purpose of this  
paper is statistically examine the velocity difference between the IP shock propagation and solar wind speed (accordingly, the  
difference in the arrival time to the Earth) using both L1 monitoring spacecraft (SOHO and ACE) and timing of the geomagnetic  
sudden commencement (SC), the latter of which can be used as the arrival time of the IP shock to the Earth. With very long L1

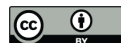

60 monitoring by SOHO (since 1996) and ACE (since 1997), there is a sufficient number of IP shocks that are identified in both spacecraft, with clear geomagnetic SC signatures.

## 2 Data and Method

Located at the Sun-Earth L1 point, which is about  $1.5 \times 10^6$  km upstream of the Earth, SOHO and ACE monitor the upstream solar wind. The time resolution is about 30s for SOHO and 1 min for ACE in the database we used here. Technical descriptions of the solar wind monitoring instruments are found in Ipavich (1998) for SOHO and McComas et al. (1998) for ACE. Although we conventionally call L1 "point", all L1 monitoring spacecraft take the semi-periodical halo orbit around L1, which covers much larger areas than the size of the Earth ( $0.06 \times 10^5$  km): the distance from the L1 point in the GSE *Y-Z* plane can be up to  $7 \times 10^5$  km for SOHO (<https://soho.nascom.nasa.gov/about/orbit.html>) and  $3 \times 10^5$  km for ACE ([https://izw1.caltech.edu/ACE/ASC/DATA/browse-html/y\\_z\\_plot.gif](https://izw1.caltech.edu/ACE/ASC/DATA/browse-html/y_z_plot.gif)).

We start from the IP shock list of SOHO (<https://space.umd.edu/pm/figs/history.html>) and examined the velocity profile until the end of 2022. We examine both SOHO and ACE for both timing of the IP shock and the solar wind velocity. We limit the IP shock to those that are not contaminated by high-speed periods before the IP shock. Among them, we selected those that also caused a clear geomagnetic SC signature, which indicates the arrival of the IP shock to the Earth.

The geomagnetic SC is a sudden increase in the horizontal (H) component in the dayside stations that propagates quickly to the nightside (e.g., Araki, 1977; 1994). Since the propagation time of 1-3 min from the magnetopause to the Earth is about the same as the travelling time of the solar wind from the magnetopause to the Earth's terminator, we can safely use the onset time of the geomagnetic SC as a proxy of arrival time of the IP shock to the Earth (e.g., Earth's terminator).

In this method of estimating the arrival time of the IP shock, the geomagnetic variation is sometimes contaminated by on-going geomagnetic activities (this can also be examined by the geomagnetic AE index). Therefore, we also limit to the cases when the geomagnetic SC is clearly identified in SYM-H index (e.g., Nanjo et al., 2025), which is provided by WDC (<https://wdc.kugi.kyoto-u.ac.jp/aeasy/index.html>). This gives us 438 examples out of more than 650 IP shocks in the list. To confirm our list of the geomagnetic SC, we also used the SC list provided by the Ebre Observatory (<https://www.obsebre.es/en/variaciones/rapid>), in which the magnetometer data from five longitudinally distributed low-latitude stations are used to identify the geomagnetic SC.

### 2.1 Example

85 Fig. 1 shows one such example from the IP shock on 2006-01-01. Figs. 1a and 1b show that a sudden sharp increase in the proton speed (thick black line) and density (thin blue line) occurred simultaneously for both SOHO at 13:35 UT (Fig. 1a) and ACE at 13:30 UT (Fig. 1b). Even the total IMF strength (dashed red line) observed by ACE suddenly increased simultaneously at 13:30 UT. Since the IP shock timing was identified as a sudden increase in dynamic pressure, the above timing corresponds to the IP shock timing passing through SOHO and ACE. Fig. 1c shows that SYM-H suddenly increased at 14:05 UT as an

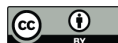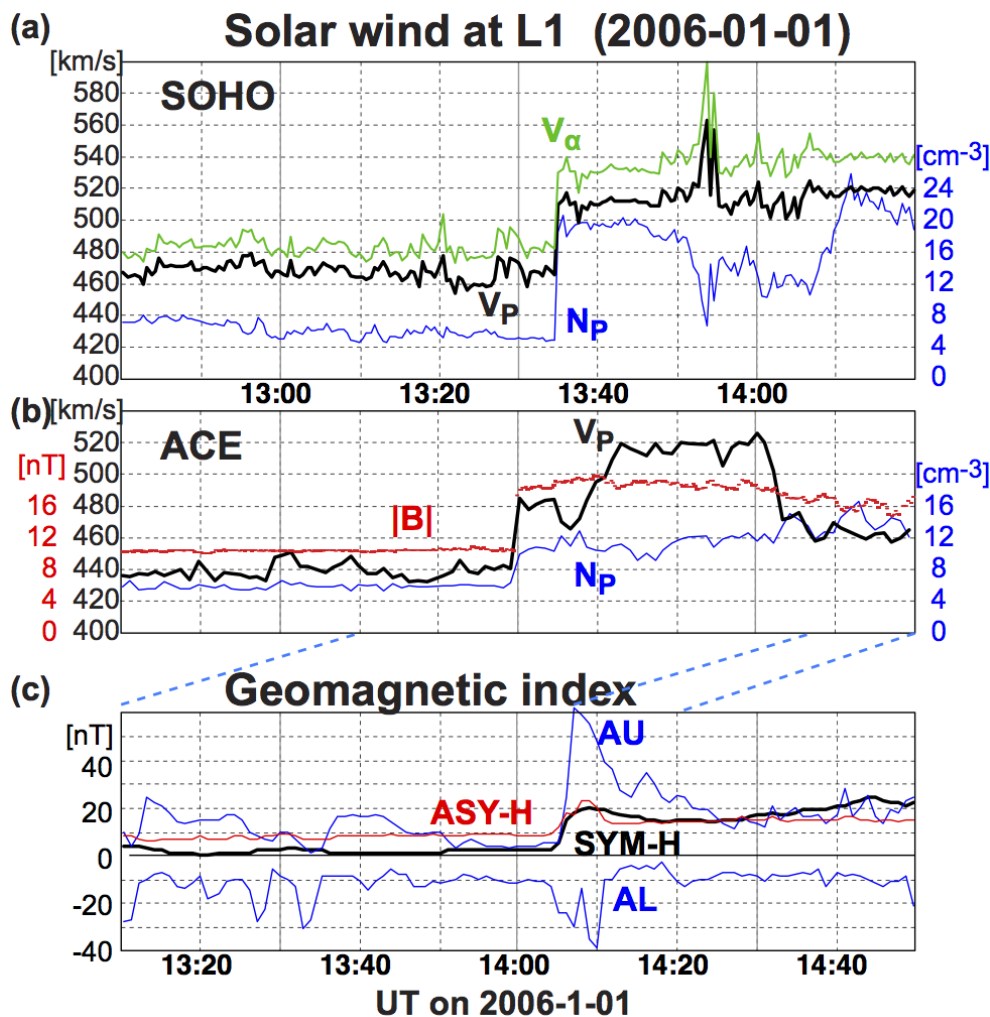

**Figure 1.** Solar wind data observed by (a) SOHO and (b) ACE for the IP shock event on 2006-01-01. The proton speed, proton density, and the IMF intensity are plotted by thick black lines, thin blue lines, and a thin red line, respectively. As a reference, speed of the alpha particle is also shown in (a) with a green line. The IP shock is identified as sudden simultaneous intensification of the density and velocity for both SOHO (13:35 UT) and ACE (13:30 UT). The IMF total field measured by ACE also shows sudden intensification the same timing (13:30 UT). (c) Geomagnetic indices SYM-H (thick black lines), ASY-H (thin red line), AU and AL (both thin blue lines) for the same IP. Sudden increase of SYM-H (and ASY-H and AU) is observed at 14:05 UT.

90 isolated geomagnetic SC during a quiet period without any contamination from any magnetospheric activities (as seen from AU and AL indices).

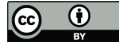

Let us estimate the propagation speed of the IP shock in the  $-X_{GSE}$  direction. From the above timings, travel time of the IP shock is estimated as  $dt_{soho} = 30 \pm 1$  min for SOHO-Earth propagation and  $dt_{ace} = 35 \pm 1$  min for ACE-Earth propagation. We consider following two ideal cases.

95 (a) If the shock normal (phase plane normal) points the  $-X_{GSE}$  direction, the  $X_{soho}$  distance of  $1.263 \times 10^6$  km means about  $\sim 700 \pm 30$  km, and  $X_{ace} = 1.440 \times 10^6$  km means about  $\sim 690 \pm 20$  km. Both values are consistent with each other, but much faster than the measured solar wind speed. To check this, we also estimated the propagation speed from the ACE location to the SOHO location using  $5 \pm 1$  min time lag between these spacecraft. This gives us  $\sim 590 \pm 150$  km/s along  $-X_{GSE}$  direction, which is within the consistent range with the above values.

100 (b) If the shock front is tilted by  $45^\circ$  toward the Parker spiral direction, we have to take into consideration of the GSE  $Y$  location of the spacecraft (GSE  $Y_{soho} = 4.69 \times 10^5$  km for SOHO and  $Y_{ace} = -2.467 \times 10^5$  km for ACE). Projecting these location to GSE  $Y = 0$ , the  $X$  distance to the IP shock on the Sun-Earth line is estimated as  $1.732 \times 10^6$  km at 13:35 UT for SOHO and as  $1.193 \times 10^6$  km at 13:30 UT for ACE. These values give about  $\sim 960 \pm 30$  km from the SOHO-Earth timings and  $\sim 570 \pm 20$  km from the ACE-Earth timings. Meanwhile, the inter-spacecraft time lag of  $5 \pm 1$  min also means a backward  
105 propagation with  $-1800 \pm 450$  km/s. All estimates of the propagation velocity (SOHO to the Earth, ACE to the Earth, and ACE to SOHO) contradict each other.

From (a) and (b), we can safely assume that the shock normal points nearly along the  $-X_{GSE}$  direction, with the IP propagation speed of  $\sim 690 \pm 20$  km. This is quite different from the maximum solar wind speed of 519 km/s (same value for both SOHO and ACE) observed within 15 min after the IP shock passage.

110 The derived IP shock propagation speed is even much faster than the theoretical propagation speed in a simple 1D shock model (cf. Appendix A). In the SOHO observation, the density jump across the IP shock passage is about 4 times, whereas the speed changed from 470 km/s to 520 km/s. These values lead to an estimate of 540 km/s as the propagation speed in the simple 1D shock model. On the other hand, the density jump across the shock observed by ACE is only double, i.e., much smaller than the SOHO observation, whereas the solar wind speed jumped from 440 km/s to 520 km/s, i.e., much larger than  
115 the SOHO observation. Accordingly, the estimated propagation speed in the same 1D shock model is 600 km/s.

The difference in the jump across the shock between the ACE observation and the SOHO observation might come from the instrumental difference (e.g., different saturation level) although it might reflect non-uniformity of the shock. Generally, density measurements are less reliable than the velocity measurements during high-flux events such as CME. Even if the observation is real, these theoretical propagation speeds are still much lower than the observed propagation speed ( $690 \pm 20$  km/s). This  
120 example enforces the usefulness of statistical examination of the IP shock propagation speed against the solar wind speed, both of which are direct products of the most reliable measured values rather than theoretical estimates using less reliable measurements and extra assumptions.

Next, we estimate the travel time of the IP shock from SOHO or ACE to the Earth, using the solar wind (proton) velocity right after the shock. We take the highest value of the proton speed during 15 min after the shock detection, which is 519 km/s  
125 for both SOHO and ACE. Here, we assume the shock normal (phase plane normal) points nearly in the  $-X_{GSE}$  direction based on the above discussion (a) and (b).

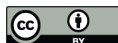

The velocity value of 519 km/s predicts a travel time of 41 min from SOHO (GSE  $X_{soho} = 1.263 \times 10^6$  km) to the Earth and 46 min from ACE (GSE  $X_{ace} = 1.440 \times 10^6$  km) to the Earth. If we take these values as the shock propagation speed, the predicted arrival time of the same solar wind to the Earth is at 14:16 UT for both SOHO and ACE. If we take the value of 540 km/s (1D shock model applied to SOHO data, see above), the travel time reduces, but only by 2 min with a predicted arrival time of 14:14 UT. Even if we use the most likely overestimated value for ACE, the predicted arrival time is 14:10 UT, which is 5 minutes after the geomagnetic SC.

In summary, the anti-sunward propagation of the IP shock propagation on the 2006-01-01 event, which is estimated as  $\sim 700$  km/s, is much faster than the solar wind ( $\sim 520$  km/s) or theoretical 1D shock propagation ( $\sim 540$  km/s). Accordingly, the actual IP shock arrived about 10 min earlier than the predicted arrival time based on these values (520 – 540 km/s).

## 2.2 Statistical method

Since we discuss statistics in this paper, we use only the  $X_{GSE}$  value of the spacecraft location in calculating the speed, because the error introduced by this assumption is expected to be equally distributed to plus side and minus side. We also assume that the arrival time of the IP shock to the Earth is the same as the onset time of the geomagnetic SC. With these assumptions, we can take the same procedure as the case (a) in interpreting Fig. 1: The propagation speed of the IP shock in the  $-X_{GSE}$  direction ( $V_{IP}$ ) is obtained from the timings of the IP shock detection by the spacecraft and the geomagnetic SC (based on the SYM-H index), and the obtained speed is compared to the measured solar wind proton speed ( $V_H$ ) for which we took the highest value during 15 min after the IP shock passage. Similarly, after calculating the predicted travel time of the IP shock using the measured solar wind speed and the  $X_{GSE}$  location of the spacecraft, we obtain the difference  $\Delta t$  (positive for earlier arrival than prediction) from the actual propagation time using these timings.

Fig. 2 shows the distribution of  $\Delta t$ : left panel (a) shows a scatter plot of  $\Delta t$  against the predicted travel time (from SOHO to the Earth) in the  $X_{GSE}$  direction; and right panel (b) shows the number of IP shocks at different  $\Delta t$ . Different colors in Fig. 2 (dark blue, light blue, and orange) represent different clearness of the SC signature (see the figure caption).

Fig. 2 includes IP shocks that are quite non-uniform in the GSE  $Y$ - $Z$  direction. In fact, the velocity profile and particularly the density profile are often different between SOHO and ACE. Although the inter-spacecraft density differences might be attributed to the different measurement methods of the solar wind protons between SOHO and ACE (ACE generally has a lower saturation level than SOHO), the inter-spacecraft difference in the velocity profile mainly comes from the non-uniform structure of the IP shock because the location difference can be as large as  $3 \times 10^5$  km in the  $X_{GSE}$  direction and  $8 \times 10^5$  km in the GSE  $Y$ - $Z$  direction. This is sufficiently large in detecting the non-uniform structure of the IP shock in the GSE  $Y$ - $Z$  direction.

In this paper, we limit to cases when the velocity profiles are consistent between SOHO and ACE with a clear IP shock signature (e.g., the velocity is relatively stable before the IP shock as mentioned above). For this, we manually examined the velocity profile. This gives us 375 "clean" examples during 1999-2022, for which we can assume that the spacecraft detected the same IP shock.

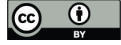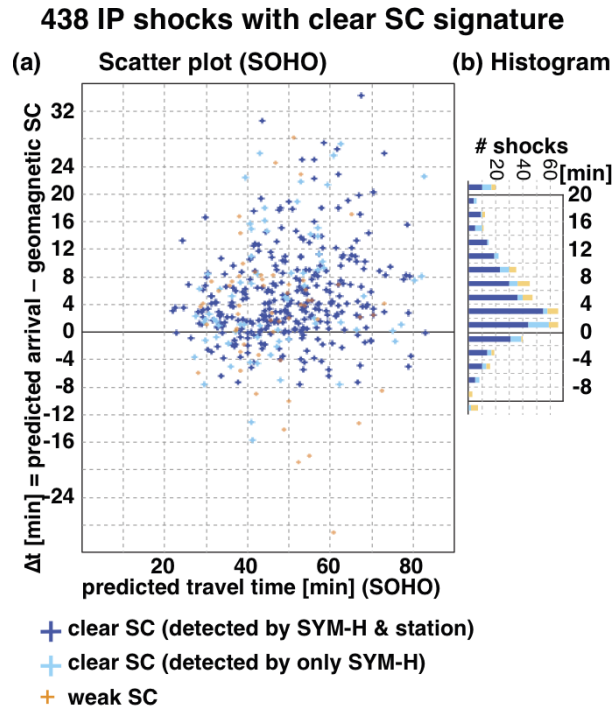

**Figure 2.** (a) Scatter plot of  $\Delta t$  against the predicted travel time in the  $-X_{GSE}$  direction (from SOHO to the Earth) for 438 IP shocks in which the IP shock and geomagnetic sudden commencement (SC) are one-to-one connected. Positive  $\Delta t$  means that the actual arrival of the IP shock to the Earth is earlier than the predicted arrival time using the solar wind speed measured by SOHO. The data are classified into three types in terms of clearness of the SC signature: dark blue, light blue, and orange represent those when the SC is clearly identified in the SYM-H index while it is also found in the SC list at Ebre Observatory (<https://www.obsebre.es/en/variaciones/rapid>), only in the SYM-H index, and only with weak or unclear SC signatures (e.g., amplitude less than 10 nT in SYM-H index or signature during some on-going activity), respectively. (b) Histogram of the time difference  $\Delta t$ , which is the same as the integration of panel (a) over all the travel time. The same colors are used for the sub-classified types.

160 From these "clean" examples, we further filtered the IP shocks in terms of the relative timing and relative location (in  $X_{GSE}$   
 only) of the IP shock detection between SOHO and ACE. We first removed those when the downstream spacecraft (in terms of  
 only  $X_{GSE}$ ) detected the IP shock earlier than the upstream spacecraft. These superficially "backward" propagation indicate  
 that the IP shock front is quite tilted in the  $Y$  direction. Accordingly, the expected arrival time of these "removed" IP shocks  
 has some offset from the geomagnetic SC detection, in both earlier and later arrival directions. Out of 375 clean IP shocks,  
 165 there are 76 such ones.

The remaining 299 IP shocks form a cleaner sub-dataset. Extending this idea, we also made another sub-dataset by limiting  
 the superficial propagation velocity of the IP shock between two spacecraft between 250 km/s and 1500 km/s. We allow a wider  
 speed range compared to the solar wind speed range because the inter-spacecraft time difference of the IP shock detection can

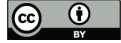

**Table 1.** Different subsets of IPs

| Number of IP shocks              | Cleaning level                                                 |
|----------------------------------|----------------------------------------------------------------|
| 438 "basic samples"              | Clear IP shock & geomagnetic SC are identified by SOHO & SYM-H |
| 375 "clean samples" out of 438   | IP shock profile is consistent between SOHO and ACE            |
| 299 "cleaner samples" out of 375 | Downstream s/c detects before upstream s/c                     |
| 195 "best samples" out of 299    | Shock normal most likely points in the $-X_{GSE}$ direction    |

be as short as 1s, with possible error of a factor of 2. There are 195 IP shocks in this category. These different levels of  
 175 "cleanness" are summarized in Table 1. A list of timings of the IP shock detection and geomagnetic SC for these 438 IP  
 shocks, including the classification of difference sub-dataset, is listed in Appendix B (Tables A1-A4).

### 3 Results

Fig. 3 shows the statistics of the time difference  $\Delta t$  for SOHO (left panels) and ACE (right panels). The format of each panel  
 is the same as Fig. 2b. The top panels (Figs. 3a and 3d) show the distributions of all 375 clean IP shocks, the middle panels  
 175 (Figs. 3b and 3e) show the distributions of cleaner subset (299 samples), and the bottom panels (Figs. 3c and 3f) show the  
 distribution of the best subset (195 samples), as is described in the previous section.

For both SOHO and ACE,  $\Delta t$  values are distributed wide spread **(-2 to +12 min for SOHO, and 0 to +14 min for ACE)**,  
 which might indicate oblique shock front (plane normal not along the  $-X$  direction). The distribution is more compact in  
 the **best dataset (Figs. 3d and 3f)**, i.e., less examples of extreme  $\Delta t$  compared to the center part (-2 min +8 min for SOHO)  
 180 than in the original 375 clean samples (Figs. 3a and 3d). This fact indicates that filtering the dataset using the superficial  
 inter-spacecraft propagation velocity is actually useful.

**In all panels, the center of  $\Delta t$  is shifted toward the positive side, i.e., the IP shock generally arrives earlier than the predicted  
 arrival time calculated from the measured solar wind speed at L1, as is expected.** Furthermore, the distribution is slightly  
 asymmetric with the positive side having a longer tail. This caused the simple average of  $\Delta t$  **(+4s for SOHO and +6s for ACE  
 185 for the best 195 IP shocks)** shifting toward larger values than the most frequent  $\Delta t$  (+3s for SOHO and +5s for ACE). The  
 earlier arrival of the IP shock to the Earth than the solar wind itself is valid in almost all cases, and negative  $\Delta t$  is most likely  
 a part of spread of the distribution, which is expected as the statistical property of the oblique shock plane, as explained in the  
 Introduction.

Fig. 4 shows the velocity difference, in the same format as Fig. 3. We plotted the distribution against  **$\log_{10}(V_{IP}/V_H)$** , where  
 190  $V_H$  is the proton velocity, and  $V_{IP}$  is the IP shock's propagation velocity. **The resultant distributions are similar to those of  $\Delta t$   
 in Fig. 3, except that the distribution for ACE is more asymmetric than Fig. 3.** Otherwise, we see the same feature in  $V_{IP}/V_H$   
 as in  $\Delta t$ . The propagation speed of the IP shock is about **-5 to +20%** faster than the solar wind speed for SOHO (0 to +25%  
 for ACE), with the most frequently difference about 10% (5 – 10% for SOHO and 10 – 15% for ACE), as shown in Figs. 4c

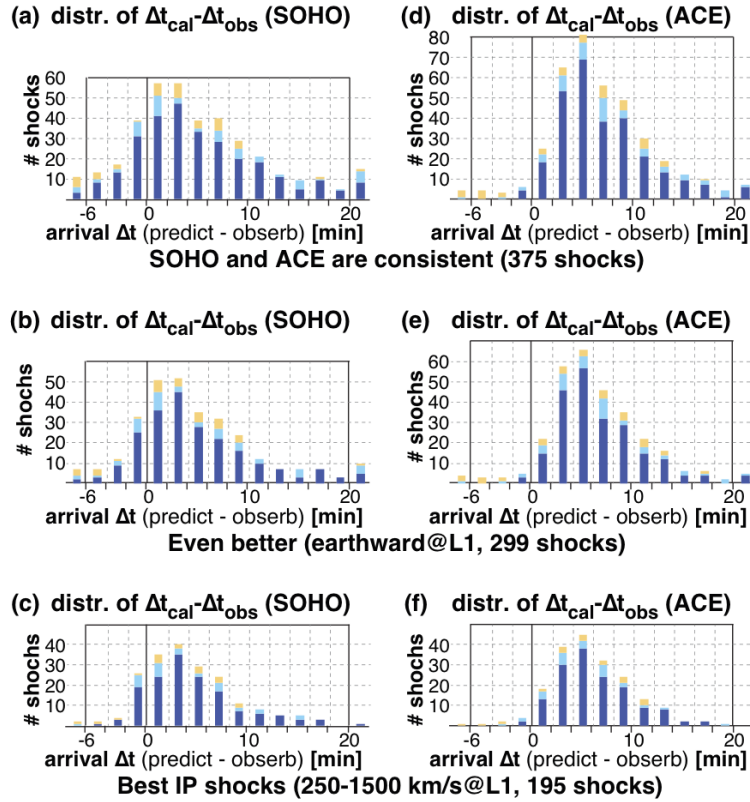

**Figure 3.** (a) and (d) Histogram of time difference  $\Delta t$  of the arrival times of the IP shock to the Earth, between the actual time using the geomagnetic sudden commencement (SC) signature seen in the SYM-H index, and the expected time using the measured solar wind velocity observed by (a) SOHO and (d) ACE. **The values at both left and right edges show the summation of extreme values for both negative ( $< -6$  min) and positive ( $> +20$  min) sides, respectively.** Positive  $\Delta t$  mean that the actual arrival of the IP shock to the Earth is earlier than the predicted arrival time using the solar wind speed measured by SOHO or ACE. The data are classified into three types in terms of clearness of the SC signature in the same manner as Fig. 2a. (b) and (e): The same as (a) and (d), respectively, but for those the superficial inter-spacecraft propagation direction between SOHO and ACE (assuming the sock normal points along  $X_{GSE}$ ) is Earthward. (c) and (f): The same as (a) and (d), respectively, but for those the superficial inter-spacecraft propagation speed is between 250 km/s and 1500 km/s.

and 4f. The spread of  $V_{IP}/V_H$  is slightly asymmetric with respect to the shifted center (most frequent ratio), with a long tail in the positive side. The simple average of  $\log_{10}(V_{IP}/V_H)$  for these 195 IP shocks is 0.041 (10% difference) for SOHO and 0.054 (13% difference) for ACE, which are again slightly higher than the most frequent difference, reflecting the asymmetric distribution toward the positive side.

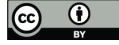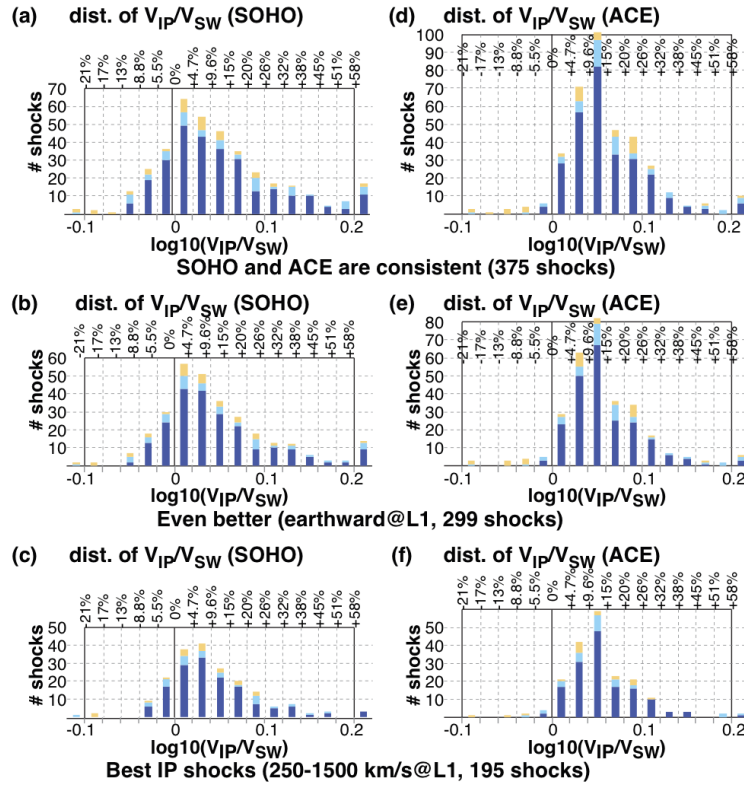

**Figure 4.** The same as Fig. 3, but for the velocity ratio between the solar wind proton velocity ( $V_H$ ) and the IP shock’s propagation velocity ( $V_{IP}$ ). The latter is calculated using the time difference between the IP shock detection at L1 and the SC signature at the Earth, and the distance to the spacecraft from the Earth along the Sun-Earth line (X-direction). We plotted against  $\log_{10}(V_{IP}/V_H)$ . The values at both left and right edges show the summation of extreme values for both negative ( $< -0.1$ , i.e.,  $< 79\%$ ) and positive ( $> +0.2$ , i.e.,  $> 158\%$ ) sides, respectively.

## 4 Discussion

The SOHO and ACE statistics of the IP shock during 1998-2022 shows that the geomagnetic SC takes place generally earlier than the predicted arrival time using the measured solar wind speed at L1 (highest proton speed within 15 min after the IP shock passage). The individual arrival time spreads over from about  $\Delta t = -2$  to  $+12$  min, with a finite number of IP shocks arrived more than 10 min earlier than the predicted time, as shown in Fig. 4c. The corresponding propagation speed of the IP shock (derived from the arrival timings of the IP shock at L1 and geomagnetic SC at the Earth) is about  $-5$  to  $+20\%$  faster than the solar wind speed for SOHO (0 to  $+25\%$  for ACE), with the most frequent difference about 10% (5 – 10% for SOHO and 10 – 15% for ACE), as shown in Fig. 4f.

The average differences between the IP propagation speed and the solar wind speed are consistent with the shock theory, but not all individual cases, like the example in Fig. 1. Furthermore, the spread of  $\Delta t$  is much longer toward large positive values

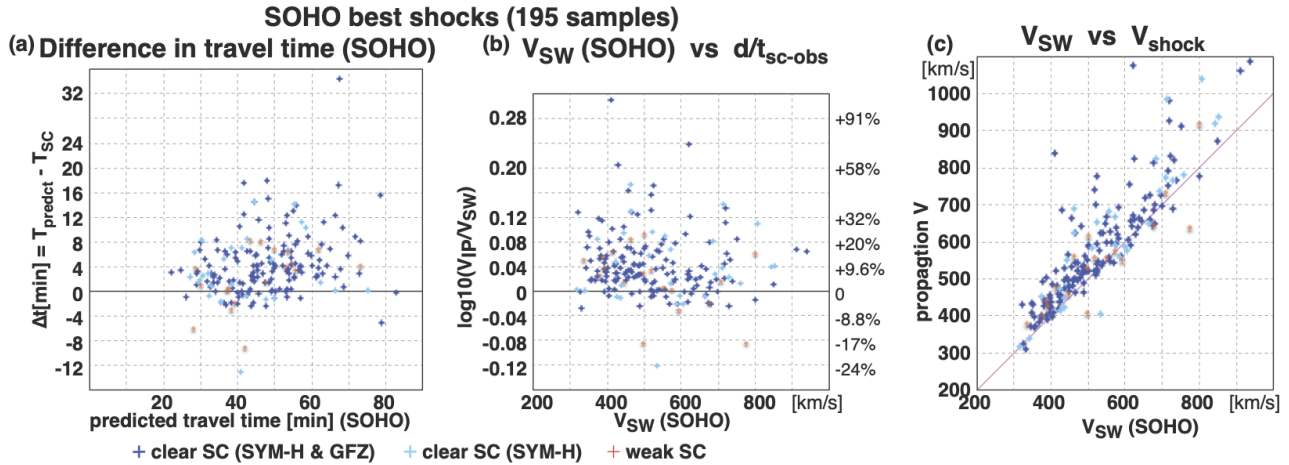

**Figure 5.** Scatter plot of the best 195 IP shocks in the same format as Fig. 2a: (a)  $\Delta t$  against the predicted travel time in the  $X_{GSE}$  direction (from SOHO to the Earth); (b) the ratio velocity  $\log_{10}(V_{\text{IP}}/V_{\text{H}})$  for SOHO observation against the solar wind velocity observed for the SOHO observation; and (c)  $V_{\text{IP}}$  against  $V_{\text{H}}$  for SOHO observation.

(earlier arrival than prediction) than toward the negative values. Therefore, it is worth examining these extreme cases in the light of shock models in future (this is outside the scope of this paper).

210 In the present study, the differences in the speed turned out to be only about 10% (with about 5% accuracy). For such a small differences, we must consider possible error sources in the measurements (solar wind speed and timings).

#### 4.1 Velocity value

One obvious question is the accuracy of the velocity values. Although the SOHO proton monitor velocity is well calibrated against those measured by other SOHO instruments and other monitoring spacecraft such as Wind, with a difference less than 215 1% and a spread less than 3% (e.g., Ipavich, 1998), the calibration is not made during the IP shock passage when the shock speed suddenly increases. Such a saturation effect is expected most significant for ACE and SOHO, and actually the relative solar wind velocity compared the propagation velocity (Fig. 4) is smaller for the ACE observation (difference is larger) than for the SOHO observation. Can saturation occur even for SOHO?

To examine this, Fig. 5 shows the scatter plot using SOHO data (the same format as Fig. 2a) for the best 195 samples. 220 The left panel shows  $\Delta t$  against the predicted travel time (corresponding to Fig. 3c), and the middle panel shows  $V_{\text{IP}}/V_{\text{H}}$  in logarithmic scale against the measured solar wind speed by SOHO (corresponding to Fig. 4c). As reference, the scatter plot of the propagation velocity  $V_{\text{IP}}$  against the solar wind proton velocity  $V_{\text{H}}$  is shown in Fig. 5c. If the saturation of the instrument is the reason, we expect more spread for faster solar wind (longer travel time). However, Fig. 5 shows that the spread in  $\Delta t$  or  $V_{\text{IP}}/V_{\text{H}}$  does not depend very much on the solar wind speed. So, the SOHO velocity observation is most likely reliable (within 225 1% error) even for the IP shocks that are used in this study.

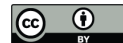

## 4.2 Change of speeds from L1 to the Earth

It is quite possible that a compressional IP shock propagation is decelerated while the solar wind is accelerated, like the high-speed CME near the Sun (Yashiro et al., 2004). If the speed changes, we have to correct the solar wind speed to the average speed between L1 and the Earth, because the shock propagation speed is derived from start-end timings, and is an average value by definition. Although the velocity measurements are statistically consistent between the L1 monitoring spacecraft and the Earth orbiting spacecraft (e.g., Ipavich, 1998), the same argument as above applies here (i.e., measurements near the IP shocks can be different from relatively constant solar wind). We do not know if the distance from L1 to the Earth, which is only 1% of the distance from the Sun to the Earth, is short enough to ignore this effect. If such an acceleration is substantial, the real offset in  $V_{IP}/V_H$  (and  $\Delta t$ ) would be smaller than the present result.

## 4.3 Transit time from the magnetopause to the Earth

The onset timing of the geomagnetic SC was used as the proxy of the timing when the IP shock passing the Earth's terminator. Considering about  $10^5$  km distance from the magnetopause to the Earth, the travelling time of the IP shock (speed of about 400-900 km/s as shown in Fig. 5c) to the terminator is estimated about 1-3 min. On the other hand, the effect of the enhanced magnetopause current propagates to the Earth (to cause the geomagnetic SC) propagates with about magnetosonic speed (not the speed of light), resulting in the a similar travel time of 1-3min. Therefore, the resultant uncertainty in  $\Delta t$  should be, if any, only 1-2 min.

To improve the accuracy of  $\Delta t$ , we need to monitor the magnetopause location. The Smile satellite (Wang et al., 2025), to be launched April 2026, can monitor the magnetopause compression using soft X-ray imaging (Sambay et al., 2025). Although the instrument design is 5-min resolution, this can go down to a few minutes for strong IP shocks. Then, we may still have a better accuracy of  $\Delta t$  if we have many IP shocks.

## 4.4 Effect of the different shock front location in the GSE Y-Z direction

Since the location of ACE and SOHO are often quite away from the Sun-Earth line (up to  $7 \times 10^5$  km for SOHO and  $3 \times 10^5$  km for ACE) as mentioned in Sect. 2, the IP shock passage at the L1 point (on the Sun-Earth line) is generally expected to be different from the shock passage time at SOHO or ACE due to the finite tilt angle of the IP shock normal from the radial (in the  $-X_{GSE}$ ) direction. For example, if the shock front is tilted by  $45^\circ$ , the difference in the passage time with 550 km/s solar wind speed can be up to  $\pm 20$  min for SOHO and up to  $\pm 9$  min for ACE. One possible solution minimise this uncertainty is to estimate the tilt angle of the shock normal  $\theta$  in the GSE  $X - Y$  plane from the relative timing of IP shock detection between two spacecraft with proper assumption of the shock plane.

By assuming a 1D plane shock with shock normal pointing within the GSE  $X - Y$  plane with angle  $\theta$ , the propagation speed using SOHO data should agree with that using ACE data:

$$[X_{soho} + (Y_{soho} \cdot \tan \theta)]/dt_{soho} = [X_{ace} + (Y_{ace} \cdot \tan \theta)]/dt_{ace}$$

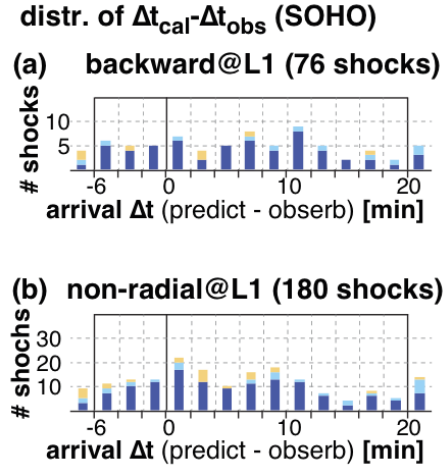

**Figure 6.** The same format as Figs. 3 for the removed IP shocks for SOHO. (a) Those when the spacecraft closer to the Earth in terms of the  $X_{GSE}$  direction detected earlier than the spacecraft farther away from the Earth. (b) Those removed from clean 375 IP shock when selecting the best 195 examples.

or

$$\tan \theta = - \frac{(X_{soho}/dt_{soho}) - (X_{ace}/dt_{ace})}{(Y_{soho}/dt_{soho}) - (Y_{ace}/dt_{ace})} \quad (1)$$

where  $dt$  is the time difference from the IP shock detection by the spacecraft to the geomagnetic SC, and suffix denotes the spacecraft name.

However, assumptions on the shock forms to make such "sophisticated" analyses may introduce another and significant error. For the Fig. 1 event in Sect. 2.1, Eq. (1) gives an estimate of  $\theta = 6^\circ \pm 9^\circ$ , and the propagation speed of IP shock as  $700 \pm 20$  km/s (cf. our simple estimation in Sect. 2.1 was  $690 \pm 20$  km/s). The value again contradicts the 1D model values of the shock propagation speed of 540 km/s (SOHO) and 600 km/s (ACE) using both velocity changes and density changes. Such a big difference indicates that the assumption on the shock form may not be simple. Therefore, we took different approach in the present analyses: we selected best examples for which the shock normal is expected to point more or less to the  $-X_{GSE}$  direction such that this error (which is expected to show symmetric distribution in both positive and negative directions) become relatively small.

With such filtering, Figs. 3c, 3f, 4c, 4f show relatively confined distribution with shifted center. In other words, the cleaning process from the 375 clear IP shocks (Figs. 3a and 3d) to the 195 best examples (Figs. 3d and 3f) most likely removed the examples with oblique shock front (i.e., large  $|\theta|$ ). On the other hand, the removed examples during this cleaning process should show relatively flat distribution in terms of the difference.

The result for SOHO is shown in Fig. 6. The flat distribution is consistent with the equal probability of the SOHO location in the GSE  $Y$ - $Z$  direction (unlike more complicated ACE location) in terms of the distance from the Sun-Earth line when the IP shock front is highly oblique. The quite different distribution between the removed examples (Fig. 6) and best examples

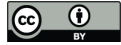

(Fig. 3) also indicates that our cleaning method using the inter-spacecraft timing difference (outward speed) works in roughly selecting IP shock with the shock front lying nearly along the SG  $Y$ - $Z$  plane.

## 5 Conclusions

As is expected from the shock theory, the IP shocks observed by SOHO and ACE propagate to the Earth faster than the solar  
280 wind. Using about 200 "best" IP shocks, in which the solar velocity profiles of SOHO and ACE are consistent with each other,  
and **the shock front less likely tilts from the GSE  $Y$ - $Z$  plane very much**, we found that the time shift  $\Delta t$  (positive means earlier  
arrival than prediction) for SOHO case ranges from **-2 to +12 min** with average **+4 min (0 to +12 min with average +6 min  
for ACE)**, as shown in Figs. 3c and 3f. These shifts correspond to about **-5 to +20%** faster shock propagation speed than the  
solar wind speed for SOHO (**0 to +25% for ACE**), with the most frequent difference about 10%, as shown in Figs. 4c and 4f.

285 Although the 10% higher speed with wide spread range in the speed ratio is not inconsistent with simple 1D shock models,  
the individual example (such as the case shown in Fig. 1) can be quite different between the estimation by simple shock model  
and the actual observation. Furthermore, the distribution of  $\Delta t$  (and the velocity ratio  $V_{IP}/V_H$ ) from the shifted center is not  
slightly asymmetric, with the positive side more extended than the negative side.

If only one spacecraft is used, the spread of  $\Delta t$  is much larger than the filtered (best) case, with a substantial fraction arriving  
290 > 10 min earlier than the predicted time. This means that one must be ready for possible space weather hazard starting earlier  
than the predicted arrival time based on the L1 monitor.

The result also warns the usage of 1-min resolution solar wind OMNI data at the magnetopause (<https://omniweb.gsfc.nasa.gov/>), in which the same propagation speed as the measured solar wind speed when projecting the L1 observation to the magnetopause nose (Omniweb, 2026).

295 *Data availability.* SOHO data is taken from SOHO site (<https://l1.umd.edu/>) and NASA NASADCC site (<https://cdaweb.gsfc.nasa.gov/>).  
ACE data is taken from both ACE site (<https://izw1.caltech.edu/ACE/ASC/level2/index.html>) and NASA NASADCC site (<https://cdaweb.gsfc.nasa.gov/>). Geomagnetic indices are taken WDC-C2 for geomagnetism, Kyoto University (<https://wdc.kugi.kyoto-u.ac.jp/wdc/Sec3.html>). Another list of geomagnetic sudden commencement is found at Ebre Observatory data portal (<https://www.obsebre.es/en/variations/rapid>).

## 300 Appendix A: 1D-shock mass flux conservation relation

Fig. A1 illustrates the mass flux conservation relation for a textbook-type 1D compressional shock. Through conservation  
relation in the shock frame, the density  $n$  and velocity  $V$  in the spacecraft frame has a relation of

$$n_a \cdot (V_{sh} - V_a) = n_b \cdot (V_{sh} - V_b)$$



(a) Spacecraft rest frame

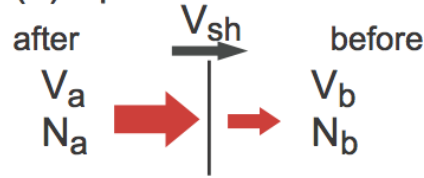

(b) Shock rest frame

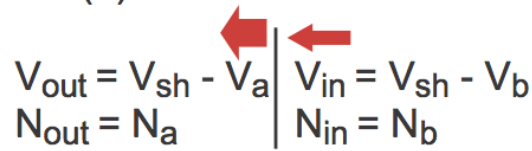

$$V_{out} \cdot N_{out} = V_{in} \cdot N_{in}$$

**Figure A1.** Illustration of mass flux ( $n \cdot v$ , where  $n$  is density and  $v$  is 1D speed) conservation across a 1D shock in (a) spacecraft rest frame and (b) shock rest frame. Suffix "a", "b", and "sh" in the upper panel denote after the shock passage, before the shock passage, and shock front, respectively. Suffix "in" and "out" in the lower panel denote the inflow to the shock and outflow from the shock, respectively.

or

$$305 \quad (V_{sh}/V_a) = \frac{1 - \epsilon \cdot (V_b/V_a)}{(1 - \epsilon)} \tag{A1}$$

$> 1$  (for compressional shock)

where  $\epsilon = (n_b/n_a) < 1$ , and suffix "a", "b", and "sh" denote after the shock passage, before after the shock passage, and shock front, respectively.

**Appendix B: Timing list of IP shocks**

310 **Table A1** lists the timings of the best 195 IP shocks (see Table 1) that was used in making Figs.3c, 3f, 4c, and 4f. The second and third columns show the UTs of IP shock detection by SOHO and by ACE, respectively. The fourth column shows the onset UT of sudden increase of SYM-H. The last column indicates the clearness of the SC (see caption of Fig. 2).

In the same format, **Table A2** lists the timings of the remaining 104 IP shocks other than the best 195 shocks (after removing the samples listed in **Table A1**) out of 299 "cleaner" IP shock in Table 1. This subset is used in making Figs 6b.

315 Similarly, **Table A3** lists the timings of the remaining 76 IP shocks (after removing the samples listed in Tables A1 and A2) out of 375 "clean" IP shock on Table 1. This subset is used in making Figs 6a.

Finally, Table A4 lists the timings of the 63 IP shocks with only SOHO data (after removing the samples listed in Tables B1, B2, and B3) out of 438 "basic samples" IP shock in Table 1.



320 *Author contributions.* MY and YY initiated the work. YY made overview plots related to SOHO and ACE in several format for all the events, and prepared tables that contain the velocity, timing, and the expected transit time. MY made the sub-dataset of the geomagnetic SYM-H indices (SYMASY) to identify the onset timing of geomagnetic SC timing, and examined all these plots to revise and complete the table made by YY. TK mainly contributed to SYM-H part, and JM made independent SC list from different dataset. MY made first draft of the text and figures, while all others contributed the text and discussion.

*Competing interests.* The authors declare that they have no competing interests.

325 *Acknowledgements.* SOHO is a project of international cooperation between ESA and NASA. ACE is a NASA project that is aimed as the solar wind monitor during the International Solar Terrestrial Program. Data from both spacecraft are open access. The authors gratefully thank the instrument teams that maintained the quality of the solar wind data at L1 for nearly 30 years that are used in this study: SOHO PM team (PI: F.M. Ipavich), ACE SWEPAN team (PI: D.J McComas), and ACE MG team (PI: N. Ness). The NASA OMINI data at Omniweb site is maintained by Space Physics Data Facility, NASA Goddard Space Flight Center.

330 Geomagnetic indices SYMASY and AE are calculated by World Data Center (WDC) for Geomagnetism, Kyoto using geomagnetic field data at SYMASY stations (San Juan, Fredericksburg, Boulder, Tucson, Papeete, Honolulu, Memambetsu, Urumqi, Alma Ata, Alibag, Martin de Vivies, Hermanus, Chambon-la-Foret) and AE stations (Abisko, Amderma, Dixon Island, Cape Chelyuskin, Tixie Bay, Pebek, Cape Wellen, Barrow, College, Yellowknife, Fort Churchill, Sanikiluaq, Great Whale River, Poste-de-la-Baleine, Narsarsuaq, Leirvogur). The geomagnetic SC list at Ebre Observatory (<https://www.obsebre.es/en/variations/rapid>) is derived from geomagnetic field data at many  
335 stations listed there. We thank all these contributing observatories.

Special thank goes to T. Araki (diseased August 2025) who initiate another work for which the produced plots lead this work. Without him, we never started this work. MY is partly supported by Swedish National Space Agency (dnr 2024-00124).

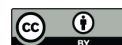

## References

- Araki, T.: Global structure of geomagnetic sudden commencements, *Planet. Space Sc.*, 25, 373-384, [https://doi.org/10.1016/0032-0633\(77\)90053-8](https://doi.org/10.1016/0032-0633(77)90053-8), 1977.
- Araki, T.: A Physical Model of the Geomagnetic Sudden Commencement, 183-200, American Geophysical Union (AGU), ISBN 9781118663943, <https://doi.org/10.1029/GM081p0183>, 1994.
- Collier, M.R., Slavin, J.A., Lepping, R.P., Szabo, A., and Ogilvie, K.: Timing accuracy for the simple planar propagation of magnetic field structures in the solar wind, *Geophys. Res. Lett.*, 25, 2509-2512, <https://doi.org/10.1029/98GL00735>, 1998.
- 345 Gonzalez-Esparza, A. and Aguilar-Rodriguez, E.: Speed evolution of fast CME/shocks with SOHO/LASCO, WIND/WAVES, IPS and in-situ WIND data: analysis of kilometric type-II emissions, *Ann. Geophys.*, 27, 3957-3966, <https://doi.org/10.5194/angeo-27-3957-2009>, 2009.
- Ipavich, F.M., Galvin, A.B., Lasley, S.E., Paquette, J.A., Hefli, S., Reiche, K.U., et al.: Solar wind measurements with SOHO: The CELIAS/MTOF proton monitor *J. Geophys. Res.*, 103, 17205-17213 <https://doi.org/10.1029/97JA02770>, 1998.
- King, J., and Papitashvili, N.: Explanation of one min and 5-min solar wind data sets at the Earth's bow shock nose of OMNIWeb, [https://omniweb.gsfc.nasa.gov/html/omni\\_min\\_data.html#3](https://omniweb.gsfc.nasa.gov/html/omni_min_data.html#3), (last access, 12 February 2026), 2025.
- 350 Manoharan, P.K., Tokumaru, M., Pick, M., Subramanian, P., Ipavich, F.M., Schenk, K., Kaiser, M.L., Lepping, R.P., and Vourlidas, A.: Coronal mass ejection of 2000 July 14 flare event: Imaging from near-Sun to Earth environment, *Astrophys. J.*, 559, 1180-1189, <https://doi.org/10.1086/322332>, 2001.
- McComas, D.J., Bame, S.J., Barker, P., Feldman, W.C., Phillips, J.L., Riley, P., and J.W. Griffee J.W.: Solar Wind Electron Proton Alpha Monitor (SWEPAM) for the Advanced Composition Explorer, *Space Sci. Rev.* 86, 563-612, <https://doi.org/10.1023/A:1005040232597>, 1998.
- 355 Milan, S.E., Carter, J.A., Bower, G.E., Fleetham, A.L., and Anderson, B.J.: Influence of off-Sun-Earth line distance on the accuracy of L1 solar wind monitoring, *J. Geophys. Res.*, 127, e2021JA030212, <https://doi.org/10.1029/2021JA030212>, 2022
- Nanjo, S., Yamauchi, M., Johnsen, M.G., Yokoyama, Y., Brändström, U., Ogawa, Y., Willer, A.N., and Hosokawa, K.: Leaping and vortex motion of the shock aurora toward the late evening sector observed on 26 February 2023, *Ann. Geophys.*, 43, 303-317, <https://doi.org/10.5194/angeo-43-303-2025>, 2025.
- 360 NASA Goddard Space Flight Center: Omniweb Plus <https://omniweb.gsfc.nasa.gov/>, (last access, 12 February 2026), 2026.
- Paularena, K.I., Richardson, J.D., Zastenker, G.N., Dalin, P.A.: Solar wind correlations: Using a solar wind monitor successfully, In: Sibeck, D.G., Kudela, K. (eds) *Interball in the ISTP Program*. NATO Science Series, vol 537. Springer, Dordrecht. [https://doi.org/10.1007/978-94-011-4487-2\\_12](https://doi.org/10.1007/978-94-011-4487-2_12), 1999.
- 365 Paularena, K.I., Zastenker, G.N., Lazarus, A.J. and Dalin, P.A.: Solar wind plasma correlations between IMP 8, INTERBALL-1 and WIND, *J. Geophys. Res.*, 103, 14601-14617, <https://doi.org/10.1029/98JA00660>, 1998.
- Richardson J.D., and Paularena, K.I.: The orientation of plasma structure in the solar wind, *Geophys. Res. Lett.*, 25, 2097-2100, <https://doi.org/10.1029/98GL01520>, 1998.
- 370 Sembay, S., Cheney, A., Hampson, R., et al., The soft X-ray imager (SXI) on the SMILE Mission, *Space Sci. Rev.* 221, 113, <https://doi.org/10.1007/s11214-025-01241-y>, 2025.
- Tokumaru, M., Kojima, M., Fujiki, K., and Yamashita, M.: Tracking heliospheric disturbances by interplanetary scintillation, *Nonlin. Processes Geophys.*, 13, 329-338, <https://doi.org/10.5194/npg-13-329-2006>, 2006.

<https://doi.org/10.5194/egusphere-2026-1517>

Preprint. Discussion started: 21 April 2026

© Author(s) 2026. CC BY 4.0 License.

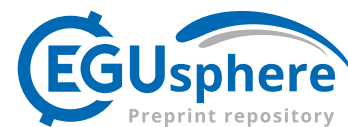

375 Wang, C., Branduardi-Raymont, G., Escoubet, C.P., and Forsyth, C.: Solar wind magnetosphere ionosphere link explorer (SMILE): Science and mission overview, *Space Sci. Rev.* 221, 9, <https://doi.org/10.1007/s11214-024-01126-6>, 2025.

Yashiro, S., Gopalswamy, N., Michalek, G., St. Cyr, O.C., Plunkett, S.P., Rich, N.B., and Howard, R. A.: A catalog of white light coronal mass ejections observed by the SOHO spacecraft, *J. Geophys. Res.*, 109, A07105, <https://doi.org/10.1029/2003JA010282>, 2004.

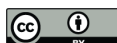

Table A1: Timing of IP detection and geomagnetic SC for best 195 samples

| Date     | SOHO  | ACE   | SYM-H | SC <sup>*1</sup> |
|----------|-------|-------|-------|------------------|
| 19980407 | 16:58 | 16:51 | 17:51 | both             |
| 19980501 | 21:14 | 21:22 | 21:57 | both             |
| 19980529 | 14:58 | 15:03 | 15:38 | both             |
| 19981107 | 07:34 | 07:37 | 08:16 | both             |
| 19990310 | 00:45 | 00:40 | 01:31 | both             |
| 19990505 | 14:45 | 14:59 | 15:43 | both             |
| 19990517 | 23:53 | 24:03 | 24:57 | both             |
| 19990626 | 19:26 | 19:25 | 20:17 | both             |
| 19990706 | 14:22 | 14:17 | 15:10 | both             |
| 19990804 | 01:30 | 01:16 | 02:20 | both             |
| 19990815 | 09:51 | 09:38 | 10:44 | both             |
| 19991021 | 01:33 | 01:38 | 02:26 | both             |
| 19991028 | 11:16 | 11:27 | 12:16 | both             |
| 19991105 | 19:07 | 19:14 | 20:10 | both             |
| 20000111 | 13:51 | 13:40 | 14:27 | both             |
| 20000127 | 14:13 | 13:56 | 14:53 | both             |
| 20000205 | 15:00 | 14:48 | 15:44 | both             |
| 20000211 | 02:21 | 02:13 | 02:59 | both             |
| 20000211 | 23:23 | 23:18 | 23:53 | both             |
| 20000214 | 07:07 | 06:56 | 07:33 | both             |
| 20000220 | 20:56 | 20:46 | 21:40 | both             |
| 20000406 | 16:01 | 16:04 | 16:40 | both             |
| 20000623 | 12:33 | 12:27 | 13:03 | both             |
| 20000713 | 09:10 | 09:01 | 09:43 | both             |
| 20000719 | 15:00 | 14:47 | 15:26 | both             |
| 20000726 | 18:08 | 17:55 | 18:57 | both             |
| 20000728 | 05:53 | 05:42 | 06:34 | both             |
| 20000811 | 18:18 | 18:11 | 18:46 | both             |
| 20000906 | 16:18 | 16:13 | 17:01 | both             |
| 20001005 | 02:35 | 02:40 | 03:26 | both             |
| 20001012 | 21:35 | 21:44 | 22:28 | both             |
| 20001028 | 09:00 | 09:08 | 09:55 | both             |
| 20001031 | 16:22 | 16:30 | 17:15 | both             |
| 20001104 | 01:29 | 01:34 | 02:21 | both             |
| 20001106 | 09:06 | 09:15 | 09:49 | both             |
| 20010110 | 15:28 | 15:19 | 16:21 | both             |
| 20010117 | 15:45 | 15:31 | 16:32 | both             |
| 20010123 | 10:15 | 10:06 | 10:49 | both             |
| 20010131 | 07:35 | 07:22 | 08:05 | both             |
| 20010331 | 00:14 | 00:23 | 00:52 | both             |
| 20010408 | 10:23 | 10:32 | 11:02 | both             |
| 20010411 | 13:02 | 13:14 | 13:44 | both             |
| 20010413 | 07:05 | 07:13 | 07:35 | both             |
| 20010417 | 23:56 | 24:05 | 24:47 | both             |
| 20010421 | 14:57 | 15:06 | 16:01 | both             |
| 20010428 | 04:28 | 04:31 | 05:00 | both             |
| 20010527 | 14:17 | 14:18 | 14:59 | both             |
| 20010803 | 06:37 | 06:25 | 07:16 | both             |
| 20010817 | 10:26 | 10:16 | 11:03 | both             |
| 20010929 | 09:03 | 09:05 | 09:39 | both             |
| 20010930 | 18:41 | 18:46 | 19:25 | both             |
| 20011011 | 16:12 | 16:20 | 17:01 | both             |
| 20011021 | 16:05 | 16:12 | 16:47 | both             |

|          |       |       |       |      |
|----------|-------|-------|-------|------|
| 20011025 | 07:57 | 08:02 | 08:50 | both |
| 20011028 | 02:33 | 02:43 | 03:19 | both |
| 20011031 | 12:49 | 12:53 | 13:49 | both |
| 20011115 | 13:45 | 13:53 | 15:09 | both |
| 20011119 | 17:34 | 17:35 | 18:15 | both |
| 20011229 | 04:56 | 04:47 | 05:38 | both |
| 20011230 | 19:39 | 19:32 | 20:10 | both |
| 20020131 | 20:44 | 20:38 | 21:26 | both |
| 20020318 | 12:32 | 12:36 | 13:21 | both |
| 20020320 | 13:04 | 13:06 | 13:28 | both |
| 20020323 | 10:46 | 10:53 | 11:36 | both |
| 20020329 | 21:27 | 21:40 | 22:37 | both |
| 20020417 | 10:13 | 10:21 | 11:07 | both |
| 20020419 | 07:58 | 08:02 | 08:35 | both |
| 20020423 | 04:07 | 04:15 | 04:49 | both |
| 20020719 | 09:36 | 09:32 | 10:09 | both |
| 20020725 | 13:03 | 12:59 | 13:37 | both |
| 20020729 | 12:43 | 12:40 | 13:22 | both |
| 20020801 | 22:30 | 22:20 | 23:11 | both |
| 20020818 | 18:15 | 18:10 | 18:46 | both |
| 20020930 | 07:13 | 07:21 | 08:16 | both |
| 20030408 | 00:04 | 00:15 | 01:12 | both |
| 20030618 | 04:44 | 04:29 | 05:13 | both |
| 20040122 | 01:10 | 01:04 | 01:36 | both |
| 20040403 | 08:49 | 08:56 | 09:48 | both |
| 20040412 | 17:34 | 17:36 | 18:17 | both |
| 20040726 | 22:28 | 22:26 | 22:49 | both |
| 20040913 | 19:29 | 19:34 | 20:02 | both |
| 20041107 | 17:59 | 17:53 | 18:27 | both |
| 20041205 | 07:04 | 06:55 | 07:47 | both |
| 20050528 | 03:47 | 03:31 | 04:37 | both |
| 20050529 | 09:15 | 09:03 | 09:53 | both |
| 20050612 | 06:58 | 06:51 | 07:46 | both |
| 20050710 | 02:56 | 02:47 | 03:38 | both |
| 20050824 | 05:33 | 05:38 | 06:13 | both |
| 20050902 | 13:32 | 13:40 | 14:20 | both |
| 20050909 | 13:10 | 13:16 | 14:01 | both |
| 20050915 | 08:25 | 08:29 | 09:05 | both |
| 20060101 | 13:35 | 13:29 | 14:05 | both |
| 20060428 | 00:20 | 00:11 | 01:18 | both |
| 20060819 | 10:39 | 10:50 | 11:32 | both |
| 20061214 | 13:56 | 13:52 | 14:15 | both |
| 20080528 | 01:32 | 01:28 | 02:25 | both |
| 20090528 | 04:21 | 04:16 | 05:20 | both |
| 20091004 | 03:15 | 03:07 | 04:14 | both |
| 20100402 | 06:45 | 06:35 | 07:16 | both |
| 20100405 | 07:59 | 07:54 | 08:27 | both |
| 20100411 | 12:18 | 12:13 | 13:04 | both |
| 20100803 | 16:51 | 16:55 | 17:41 | both |
| 20110329 | 15:13 | 15:01 | 16:03 | both |
| 20110418 | 06:06 | 05:56 | 06:52 | both |
| 20110711 | 08:05 | 08:10 | 08:50 | both |
| 20110909 | 11:49 | 11:42 | 12:43 | both |
| 20110917 | 03:05 | 02:55 | 03:44 | both |
| 20110926 | 12:02 | 11:52 | 12:35 | both |
| 20111005 | 06:55 | 06:46 | 07:37 | both |

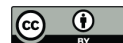

|                        |       |       |       |      |
|------------------------|-------|-------|-------|------|
| 20111024               | 17:50 | 17:48 | 18:31 | both |
| 20120307               | 03:47 | 03:35 | 04:20 | both |
| 20120312               | 08:45 | 08:42 | 09:15 | both |
| 20120315               | 12:42 | 12:35 | 13:08 | both |
| 20120423               | 02:29 | 02:27 | 03:21 | both |
| 20120616               | 08:52 | 08:57 | 09:56 | both |
| 20120616               | 19:24 | 19:30 | 20:20 | both |
| 20120903               | 11:33 | 11:22 | 12:14 | both |
| 20120930               | 22:21 | 22:13 | 23:07 | both |
| 20121031               | 14:46 | 14:39 | 15:40 | both |
| 20130216               | 11:12 | 11:10 | 12:10 | both |
| 20130315               | 04:46 | 04:40 | 05:27 | both |
| 20130317               | 05:34 | 05:27 | 06:01 | both |
| 20130627               | 13:45 | 13:52 | 14:39 | both |
| 20130820               | 21:43 | 21:33 | 22:29 | both |
| 20131002               | 01:24 | 01:18 | 01:56 | both |
| 20131213               | 12:01 | 12:08 | 13:24 | both |
| 20140107               | 14:24 | 14:25 | 15:14 | both |
| 20140220               | 02:58 | 02:51 | 03:20 | both |
| 20140227               | 16:17 | 16:07 | 16:51 | both |
| 20140503               | 16:50 | 16:49 | 17:48 | both |
| 20140911               | 23:02 | 22:57 | 23:45 | both |
| 20141223               | 10:30 | 10:33 | 11:16 | both |
| 20150317               | 04:10 | 04:03 | 04:45 | both |
| 20150815               | 07:49 | 07:44 | 08:30 | both |
| 20150920               | 05:32 | 05:27 | 06:05 | both |
| 20151106               | 17:32 | 17:34 | 18:19 | both |
| 20151219               | 15:27 | 15:28 | 16:17 | both |
| 20160719               | 23:09 | 23:03 | 23:51 | both |
| 20170831               | 04:49 | 04:44 | 05:39 | both |
| 20170906               | 23:13 | 23:08 | 23:45 | both |
| 20170907               | 22:38 | 22:35 | 23:01 | both |
| 20190510               | 16:50 | 16:53 | 17:55 | both |
| 20190708               | 18:38 | 18:30 | 19:23 | both |
| 20190727               | 08:12 | 08:07 | 09:09 | both |
| 20210827               | 00:28 | 00:24 | 01:16 | both |
| 20211227               | 08:51 | 08:41 | 09:37 | both |
| 20220201               | 21:42 | 21:36 | 22:22 | both |
| 20230315               | 03:42 | 03:48 | 04:28 | both |
| 19990221               | 21:52 | 21:46 | 22:41 | symH |
| 19990815               | 18:47 | 18:35 | 19:38 | symH |
| 20000711               | 08:22 | 08:17 | 09:16 | symH |
| 20000713               | 09:32 | 09:19 | 09:54 | symH |
| 20000814               | 21:48 | 21:36 | 22:19 | symH |
| 20010113               | 01:50 | 01:43 | 02:20 | symH |
| 20010327               | 01:03 | 01:09 | 01:44 | symH |
| 20010411               | 15:18 | 15:27 | 15:48 | symH |
| 20010818               | 05:37 | 05:24 | 06:14 | symH |
| 20020110               | 15:52 | 15:44 | 16:20 | symH |
| 20021002 <sup>*2</sup> | 22:08 | 22:14 | 22:55 | symH |
| 20021224               | 13:18 | 13:14 | 13:55 | symH |
| 20030530               | 16:02 | 15:53 | 16:24 | symH |
| 20030620               | 08:04 | 07:56 | 08:37 | symH |
| 20041109               | 18:24 | 18:20 | 18:49 | symH |
| 20050217               | 22:00 | 22:04 | 22:46 | symH |
| 20060818               | 15:41 | 15:49 | 16:42 | symH |

|                        |       |       |       |      |
|------------------------|-------|-------|-------|------|
| 20071112               | 21:37 | 21:26 | 22:21 | symH |
| 20090114               | 00:05 | 00:13 | 01:20 | symH |
| 20110929               | 00:27 | 00:20 | 01:04 | symH |
| 20111030               | 08:56 | 08:54 | 10:02 | symH |
| 20120904               | 22:12 | 22:03 | 22:46 | symH |
| 20120912               | 20:17 | 20:04 | 21:05 | symH |
| 20130525               | 09:06 | 09:09 | 09:49 | symH |
| 20130623               | 03:53 | 03:56 | 04:27 | symH |
| 20150302               | 02:47 | 02:37 | 03:18 | symH |
| 20151104               | 03:22 | 03:23 | 03:54 | symH |
| 20220615               | 04:07 | 04:00 | 04:35 | symH |
| 20220723               | 02:30 | 02:26 | 02:58 | symH |
| 19980218               | 08:01 | 07:53 | 08:44 | weak |
| 19990228               | 20:46 | 20:33 | 21:32 | weak |
| 19990823               | 11:38 | 11:29 | 12:24 | weak |
| 19991113               | 12:04 | 12:13 | 12:55 | weak |
| 20000726               | 03:02 | 02:53 | 03:52 | weak |
| 20000728               | 09:19 | 09:09 | 09:57 | weak |
| 20001028               | 05:31 | 05:41 | 06:40 | weak |
| 20021219               | 13:31 | 13:17 | 14:22 | weak |
| 20030529               | 18:36 | 18:30 | 19:01 | weak |
| 20030703               | 13:16 | 13:09 | 13:53 | weak |
| 20030717 <sup>*2</sup> | 00:13 | 00:08 | 00:42 | weak |
| 20030727 <sup>*2</sup> | 04:42 | 04:38 | 05:16 | weak |
| 20041205               | 04:16 | 04:06 | 05:11 | weak |
| 20041211               | 13:03 | 12:57 | 13:40 | weak |
| 20110623               | 02:18 | 02:24 | 02:59 | weak |
| 20140219               | 03:14 | 03:09 | 03:49 | weak |
| 20170716               | 16:58 | 16:53 | 17:39 | weak |
| 20210424               | 22:16 | 22:22 | 23:05 | weak |

\*1: Identification of geomagnetic SC by both methods (=2), by only SYM-H (=1), and weak/unclear SC (=?)

\*2: Reverse (rarefied) shock

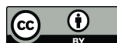

Table A2 Timing of IP detection and geomagnetic SC for better 104 samples

| Date     | SOHO  | ACE   | SYM-H | SC <sup>*1</sup> |
|----------|-------|-------|-------|------------------|
| 19980423 | 17:13 | 17:28 | 18:25 | both             |
| 19980515 | 13:41 | 13:57 | 14:52 | both             |
| 19980613 | 18:25 | 18:55 | 19:26 | both             |
| 19990626 | 02:35 | 02:18 | 03:25 | both             |
| 19991212 | 15:14 | 15:14 | 15:52 | both             |
| 20000604 | 14:17 | 14:23 | 15:02 | both             |
| 20001002 | 23:58 | 24:08 | 24:54 | both             |
| 20001128 | 04:47 | 04:57 | 05:31 | both             |
| 20010303 | 10:52 | 10:40 | 11:22 | both             |
| 20010319 | 10:12 | 10:22 | 11:14 | both             |
| 20010322 | 12:32 | 12:42 | 13:42 | both             |
| 20010327 | 17:02 | 17:15 | 17:47 | both             |
| 20010404 | 14:20 | 14:22 | 14:54 | both             |
| 20010914 | 01:07 | 01:18 | 02:05 | both             |
| 20020511 | 09:16 | 09:25 | 10:14 | both             |
| 20020520 | 02:56 | 02:57 | 03:41 | both             |
| 20020523 | 10:17 | 10:14 | 10:50 | both             |
| 20020717 | 15:29 | 15:26 | 16:03 | both             |
| 20020801 | 04:44 | 04:24 | 05:11 | both             |
| 20021126 | 21:21 | 21:10 | 21:51 | both             |
| 20030529 | 11:52 | 11:51 | 12:25 | both             |
| 20031024 | 14:47 | 14:48 | 15:25 | both             |
| 20031104 | 05:53 | 05:58 | 06:26 | both             |
| 20031115 | 05:27 | 05:18 | 05:50 | both             |
| 20031120 | 07:28 | 07:27 | 08:03 | both             |
| 20040409 | 01:47 | 01:49 | 02:33 | both             |
| 20040410 | 19:25 | 19:26 | 20:10 | both             |
| 20040730 | 20:41 | 20:31 | 21:14 | both             |
| 20041107 | 02:22 | 01:53 | 02:57 | both             |
| 20041107 | 10:22 | 09:58 | 10:53 | both             |
| 20050121 | 16:48 | 16:47 | 17:11 | both             |
| 20060709 | 21:04 | 20:46 | 21:37 | both             |
| 20061216 | 17:43 | 17:22 | 17:56 | both             |
| 20070507 | 07:48 | 07:25 | 08:27 | both             |
| 20070927 | 10:52 | 10:52 | 11:52 | both             |
| 20071025 | 10:56 | 10:38 | 11:35 | both             |
| 20090903 | 14:54 | 14:46 | 15:53 | both             |
| 20091021 | 23:25 | 23:07 | 24:18 | both             |
| 20110214 | 15:02 | 14:56 | 15:57 | both             |
| 20110218 | 00:40 | 00:40 | 01:31 | both             |
| 20110604 | 19:45 | 19:58 | 20:45 | both             |
| 20111128 | 21:27 | 21:15 | 21:51 | both             |
| 20120226 | 21:07 | 20:56 | 21:40 | both             |
| 20120521 | 18:52 | 18:44 | 19:38 | both             |
| 20120616 | 20:29 | 20:30 | 21:16 | both             |
| 20120720 | 04:00 | 04:16 | 04:49 | both             |
| 20120721 | 15:25 | 15:34 | 16:13 | both             |
| 20130119 | 16:34 | 16:46 | 17:34 | both             |
| 20130413 | 22:24 | 22:13 | 22:54 | both             |
| 20130518 | 00:23 | 00:23 | 01:11 | both             |
| 20130519 | 22:13 | 22:20 | 23:09 | both             |
| 20131008 | 19:51 | 19:40 | 20:21 | both             |
| 20140207 | 16:28 | 16:17 | 17:06 | both             |

|                        |       |       |       |      |
|------------------------|-------|-------|-------|------|
| 20140607               | 15:57 | 16:08 | 16:53 | both |
| 20140623               | 22:00 | 22:01 | 23:08 | both |
| 20140714               | 13:27 | 13:28 | 14:32 | both |
| 20140819               | 06:14 | 05:58 | 06:59 | both |
| 20140912               | 15:27 | 15:26 | 15:54 | both |
| 20141110               | 01:31 | 01:36 | 02:21 | both |
| 20141221               | 18:22 | 18:23 | 19:12 | both |
| 20150506               | 00:50 | 00:53 | 01:43 | both |
| 20161012               | 21:25 | 21:19 | 22:13 | both |
| 20161109               | 05:28 | 05:34 | 06:44 | both |
| 20170527               | 14:27 | 14:39 | 15:34 | both |
| 20170708               | 23:27 | 23:13 | 24:11 | both |
| 20170716               | 05:18 | 05:17 | 06:00 | both |
| 20170914               | 10:19 | 10:18 | 11:16 | both |
| 20180108               | 05:59 | 05:52 | 06:47 | both |
| 20180215               | 08:06 | 07:50 | 08:37 | both |
| 20180419               | 22:59 | 23:10 | 24:22 | both |
| 20190526               | 21:01 | 21:09 | 22:15 | both |
| 20210512               | 05:45 | 05:49 | 06:39 | both |
| 20210526               | 11:53 | 11:45 | 12:45 | both |
| 20000915               | 04:14 | 03:59 | 04:49 | symH |
| 20010104               | 13:07 | 13:06 | 14:02 | symH |
| 20010407               | 16:44 | 16:58 | 17:33 | symH |
| 20011001               | 21:15 | 21:29 | 22:02 | symH |
| 20020322               | 03:22 | 03:23 | 04:07 | symH |
| 20030509               | 04:49 | 04:56 | 05:20 | symH |
| 20031207               | 14:01 | 13:41 | 14:18 | symH |
| 20040801               | 02:02 | 01:49 | 02:28 | symH |
| 20090624               | 09:45 | 09:51 | 11:02 | symH |
| 20120121 <sup>*2</sup> | 03:49 | 04:00 | 05:02 | symH |
| 20120222 <sup>*2</sup> | 01:34 | 01:24 | 02:16 | symH |
| 20120520               | 01:44 | 01:37 | 02:15 | symH |
| 20121126               | 04:32 | 04:36 | 05:14 | symH |
| 20150325               | 09:21 | 09:06 | 09:58 | symH |
| 20151024               | 18:39 | 18:27 | 18:56 | symH |
| 20200630               | 01:35 | 01:23 | 02:17 | symH |
| 19981108               | 04:19 | 04:21 | 04:52 | weak |
| 20010802               | 14:27 | 14:06 | 15:11 | weak |
| 20020315               | 18:00 | 18:26 | 19:21 | weak |
| 20020907               | 15:53 | 16:09 | 16:37 | weak |
| 20050131               | 09:58 | 09:50 | 10:22 | weak |
| 20060413               | 11:41 | 11:12 | 12:04 | weak |
| 20120102               | 00:44 | 00:59 | 01:52 | weak |
| 20130602 <sup>*2</sup> | 01:57 | 02:10 | 02:26 | weak |
| 20130903               | 17:02 | 16:46 | 17:45 | weak |
| 20140810               | 21:39 | 21:26 | 22:31 | weak |
| 20141228 <sup>*2</sup> | 22:02 | 22:08 | 22:57 | weak |
| 20150201               | 06:10 | 06:01 | 06:39 | weak |
| 20150223               | 22:01 | 21:49 | 22:47 | weak |
| 20170520 <sup>*2</sup> | 08:49 | 08:49 | 09:23 | weak |
| 20190404               | 13:06 | 13:08 | 14:09 | weak |

\*1: Identification of geomagnetic SC by both methods (=2), by only SYM-H (=1), and weak/unclear SC (=?)

\*2: Reverse (rarefied) shock

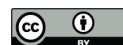

Table A3 Timing of IP detection and geomagnetic SC for very oblique 76 samples

| Date     | SOHO  | ACE   | SYM-H | SC <sup>*1</sup> |
|----------|-------|-------|-------|------------------|
| 19980503 | 17:05 | 17:00 | 17:44 | both             |
| 19980508 | 09:23 | 09:21 | 09:52 | both             |
| 19990416 | 10:46 | 10:35 | 11:26 | both             |
| 19990702 | 00:22 | 00:24 | 01:00 | both             |
| 19990712 | 01:09 | 01:15 | 02:20 | both             |
| 19990912 | 03:14 | 03:20 | 04:00 | both             |
| 20000608 | 08:42 | 08:41 | 09:10 | both             |
| 20000710 | 05:55 | 05:57 | 06:39 | both             |
| 20001126 | 11:25 | 11:23 | 11:58 | both             |
| 20010618 | 01:53 | 01:54 | 03:00 | both             |
| 20010812 | 10:48 | 10:48 | 11:35 | both             |
| 20010827 | 19:14 | 19:19 | 19:53 | both             |
| 20020217 | 01:56 | 02:09 | 02:55 | both             |
| 20020228 | 03:49 | 04:03 | 04:51 | both             |
| 20020510 | 10:28 | 10:29 | 11:24 | both             |
| 20020518 | 19:29 | 19:19 | 20:08 | both             |
| 20020530 | 01:25 | 01:32 | 02:05 | both             |
| 20021109 | 17:56 | 17:55 | 18:50 | both             |
| 20030320 | 04:21 | 04:20 | 04:44 | both             |
| 20030817 | 13:38 | 13:41 | 14:22 | both             |
| 20031026 | 18:35 | 18:31 | 19:09 | both             |
| 20040722 | 09:45 | 09:54 | 10:37 | both             |
| 20040829 | 09:20 | 09:17 | 10:06 | both             |
| 20041109 | 09:05 | 09:14 | 09:31 | both             |
| 20050727 | 18:43 | 18:49 | 19:39 | both             |
| 20070920 | 09:26 | 09:05 | 10:13 | both             |
| 20071217 | 02:02 | 02:04 | 02:53 | both             |
| 20080624 | 19:08 | 19:18 | 20:11 | both             |
| 20081124 | 22:47 | 22:48 | 23:52 | both             |
| 20090303 | 04:53 | 04:51 | 06:03 | both             |
| 20110310 | 05:45 | 06:08 | 06:34 | both             |
| 20110610 | 08:11 | 08:07 | 08:48 | both             |
| 20110617 | 02:05 | 02:01 | 02:40 | both             |
| 20110804 | 21:10 | 21:04 | 21:54 | both             |
| 20110805 | 17:23 | 17:21 | 17:51 | both             |
| 20120122 | 05:18 | 05:15 | 06:12 | both             |
| 20120714 | 17:27 | 17:27 | 18:10 | both             |
| 20121008 | 04:31 | 04:31 | 05:17 | both             |
| 20121112 | 22:08 | 22:15 | 23:13 | both             |
| 20121123 | 21:22 | 21:11 | 21:53 | both             |
| 20130125 | 16:04 | 16:00 | 17:00 | both             |
| 20130524 | 17:40 | 17:36 | 18:11 | both             |
| 20130531 | 15:32 | 15:30 | 16:19 | both             |
| 20130709 | 19:58 | 19:56 | 20:53 | both             |
| 20140109 | 19:33 | 19:31 | 20:10 | both             |
| 20140325 | 19:23 | 19:25 | 20:04 | both             |
| 20140702 | 23:33 | 23:26 | 24:43 | both             |
| 20150621 | 15:50 | 15:41 | 16:45 | both             |
| 20150622 | 04:52 | 04:51 | 05:45 | both             |
| 20150622 | 18:01 | 17:59 | 18:33 | both             |
| 20151231 | 00:10 | 00:02 | 00:50 | both             |
| 20160118 | 20:52 | 20:55 | 21:58 | both             |
| 20160414 | 06:45 | 06:51 | 07:37 | both             |

|                        |       |       |       |      |
|------------------------|-------|-------|-------|------|
| 20180309               | 17:17 | 17:22 | 18:07 | both |
| 20190924               | 12:00 | 12:03 | 13:11 | both |
| 20201210               | 01:32 | 01:33 | 02:10 | both |
| 20211127               | 22:06 | 21:59 | 22:52 | both |
| 20220313               | 10:09 | 10:06 | 10:47 | both |
| 20000424               | 08:53 | 08:51 | 09:26 | symH |
| 20031106               | 18:56 | 19:19 | 19:41 | symH |
| 20050801               | 06:09 | 06:05 | 06:37 | symH |
| 20060815               | 16:26 | 16:24 | 17:26 | symH |
| 20110805               | 18:32 | 18:32 | 19:02 | symH |
| 20130718               | 12:49 | 12:41 | 13:32 | symH |
| 20131029               | 09:25 | 09:34 | 10:35 | symH |
| 20140706               | 09:51 | 09:41 | 11:05 | symH |
| 20150331               | 07:39 | 07:40 | 08:34 | symH |
| 20150624               | 13:01 | 12:57 | 13:28 | symH |
| 20211031               | 09:34 | 09:29 | 10:12 | symH |
| 19980504               | 02:36 | 02:29 | 02:57 | weak |
| 20010830               | 13:26 | 13:30 | 14:12 | weak |
| 20020826               | 10:19 | 10:46 | 11:32 | weak |
| 20050325 <sup>*2</sup> | 16:41 | 16:37 | 17:16 | weak |
| 20111112               | 05:10 | 05:18 | 06:00 | weak |
| 20120503               | 00:59 | 01:16 | 02:19 | weak |
| 20171217               | 06:36 | 06:33 | 07:24 | weak |

\*1: Identification of geomagnetic SC by both methods (=2), by only SYM-H (=1), and weak/unclear SC (=?)

\*2: Reverse (rarefied) shock



Table A4 Timing of IP detection and geomagnetic SC for SOHO-only 63 samples

| Date                   | SOHO  | SYM-H | SC <sup>*1</sup> |
|------------------------|-------|-------|------------------|
| 19960408               | 12:33 | 13:35 | both             |
| 19970110               | 00:21 | 01:05 | both             |
| 19970209               | 12:42 | 13:22 | both             |
| 19970515               | 00:55 | 02:00 | both             |
| 19970902               | 22:03 | 23:00 | both             |
| 19971001               | 00:19 | 00:59 | both             |
| 19971023               | 07:01 | 08:06 | both             |
| 19971024               | 10:19 | 11:16 | both             |
| 19971106               | 22:06 | 22:49 | both             |
| 19971122               | 08:54 | 09:50 | both             |
| 19971210               | 04:22 | 05:27 | both             |
| 19971230               | 01:17 | 02:10 | both             |
| 19980106               | 13:18 | 14:17 | both             |
| 19980124               | 04:48 | 05:30 | both             |
| 20000714               | 15:05 | 15:32 | both             |
| 20000715               | 14:18 | 14:37 | both             |
| 20001110               | 06:00 | 06:27 | both             |
| 20010925               | 19:51 | 20:25 | both             |
| 20011106               | 01:20 | 01:52 | both             |
| 20011124               | 05:33 | 05:55 | both             |
| 20040106               | 19:24 | 19:51 | both             |
| 20050515               | 02:19 | 02:38 | both             |
| 20050713               | 04:27 | 05:13 | both             |
| 20050717               | 01:23 | 01:36 | both             |
| 20050911               | 00:49 | 01:14 | both             |
| 20110925               | 11:12 | 11:46 | both             |
| 20120124 <sup>*2</sup> | 14:33 | 15:04 | both             |
| 20120308               | 10:53 | 11:04 | both             |
| 20130822               | 18:41 | 19:26 | both             |
| 20141101               | 06:20 | 07:06 | both             |
| 19960206               | 19:02 | 19:50 | symH             |
| 19970111               | 04:27 | 05:16 | symH             |
| 19970520               | 04:46 | 06:02 | symH             |
| 19970903               | 08:11 | 08:56 | symH             |
| 19971109               | 21:51 | 22:54 | symH             |
| 19990628               | 02:28 | 02:59 | symH             |
| 20000917               | 15:19 | 16:00 | symH             |
| 20010118               | 09:18 | 10:12 | symH             |
| 20030217               | 22:55 | 23:26 | symH             |
| 20040122 <sup>*2</sup> | 08:45 | 09:22 | symH             |
| 20040126               | 18:34 | 19:21 | symH             |
| 20050429               | 15:31 | 16:06 | symH             |
| 20050529               | 20:51 | 21:29 | symH             |
| 20081028               | 19:44 | 20:10 | symH             |
| 20160311               | 04:45 | 05:34 | symH             |
| 20160725               | 01:15 | 02:12 | symH             |
| 20220519               | 13:31 | 13:56 | symH             |
| 19980131               | 15:56 | 16:44 | weak             |
| 19980325               | 15:33 | 16:33 | weak             |
| 19991204               | 00:47 | 01:31 | weak             |
| 20000427               | 20:01 | 21:06 | weak             |
| 20020326 <sup>*2</sup> | 10:13 | 10:50 | weak             |
| 20030127               | 16:35 | 16:59 | weak             |

|                        |       |       |      |
|------------------------|-------|-------|------|
| 20030311               | 15:46 | 17:16 | weak |
| 20030714               | 10:42 | 11:18 | weak |
| 20030726               | 12:36 | 13:06 | weak |
| 20031122               | 09:59 | 10:29 | weak |
| 20050508               | 09:07 | 09:34 | weak |
| 20061208               | 04:11 | 04:36 | weak |
| 20100908               | 01:07 | 02:18 | weak |
| 20150206               | 07:40 | 08:02 | weak |
| 20160311 <sup>*2</sup> | 19:18 | 19:47 | weak |
| 20201023               | 16:03 | 16:51 | weak |

\*1: Identification of geomagnetic SC by both methods (=2), by only SYM-H (=1), and weak/unclear SC (=?)

\*2: Reverse (rarefied) shock
